1                   **Myosin II isoforms play distinct roles in *adherens* junction biogenesis**

2  
3  
4  
5  
6  
7  
8  
9  
10  
11  
12  
13  
14  
15  
16  
17  
18  
19  
20  
21  
22  
23  
24  
25  
26  
27  
28

Mélina L. Heuzé<sup>1§\*</sup>, Gautham Sankara<sup>1§</sup>, Tien Dang<sup>1</sup>, Joseph d'Alessandro<sup>1</sup>, Victor Cellerin<sup>1</sup>  
David S. Williams<sup>2</sup>, Jan C. M. van Hest<sup>3</sup>, Philippe Marcq<sup>4</sup>, René-Marc Mège<sup>1\*</sup>, Benoît Ladoux<sup>1\*</sup>.

<sup>1</sup> Institut Jacques Monod, CNRS UMR 7592, Université Paris Diderot, Paris, France.

<sup>2</sup> Department of Chemistry, College of Science, Swansea University, Swansea, UK.

<sup>3</sup> Eindhoven University of Technology, Institute for Complex Molecular Systems, Eindhoven  
The Netherlands.

<sup>4</sup> Laboratoire Physique et Mécanique des Milieux Hétérogènes, CNRS UMR 7636, Sorbonne  
Université, Paris, France.

§ These authors contributed equally to the work.

\* Co-corresponding authors.

## 29 **Abstract**

30 Adherens junction (AJ) assembly under force is essential for many biological processes like  
31 epithelial monolayer bending, collective cell migration, cell extrusion and wound healing. The  
32 acto-myosin cytoskeleton acts as a major force-generator during the *de novo* formation and  
33 remodelling of AJ. Here, we investigated the role of myosinII isoforms in epithelial junction  
34 assembly. Myosin IIA (NMIIA) and Myosin IIB (NMIIB) differentially regulate biogenesis of  
35 adherens junction through association with distinct actin networks. Analysis of junction  
36 dynamics, actin organization, and mechanical forces of control and knockdown cells for  
37 myosins revealed that NMIIA provides the mechanical tugging force necessary for cell-cell  
38 junction reinforcement and maintenance. NMIIB is involved in E-cadherin clustering,  
39 maintenance of a branched actin layer connecting E-cadherin complexes and perijunctional  
40 actin fibres leading to the building-up of anisotropic stress. These data reveal unanticipated  
41 complementary functions of NMIIA and NMIIB in the biogenesis and integrity of AJ.

42

## 43 **Introduction**

44 Tissue integrity and plasticity rely on cell-cell adhesion and cell contractility. The formation,  
45 remodelling and disassembly of cell-cell adhesions are fundamental events accompanying all  
46 stages of morphogenesis, tissue homeostasis and healing. *Adherens* junctions (AJ) mediated  
47 by E-cadherin/catenin complexes are key elements of epithelial cell-cell adhesions and the  
48 first ones to assemble upon contact initiation<sup>1-3</sup>. They provide strong mechanical coupling  
49 between neighbouring cells through association with the acto-myosin cytoskeleton<sup>4</sup>.

50 The assembly of *de novo* AJ is crucial for cell-cell rearrangement<sup>5,6</sup>, tissue closure<sup>7</sup> and the  
51 maintenance of epithelial cell integrity during wound healing or cell extrusion<sup>8-10</sup>. During *de*  
52 *novo* cell-cell contacts formation, initial contacts between facing lamellipodia induce immediate  
53 clustering of cadherin molecules by trans- and cis-oligomerization<sup>11-14</sup>. Subsequent signalling  
54 events involving RhoGTPases trigger local remodelling of the actin cytoskeleton through  
55 Arp2/3- or formin-mediated actin polarization in the vicinity of AJs<sup>15-17</sup>. These cytoskeletal  
56 rearrangements drive the expansion of cell-cell contacts and inter-cellular adhesion

57 strengthening<sup>2,18,19</sup>.

58 Non-muscle Myosin II (NMII) has emerged as a fundamental player in force-generation and  
59 force-transmission at AJ both *in vitro* and *in vivo*<sup>20–22</sup>. NMII is essential for epithelial tissue  
60 architecture<sup>23</sup>, epithelial tissue morphogenesis<sup>24</sup>, tissue repair<sup>25,26</sup> and cell extrusion<sup>27</sup>. NMII  
61 protects junctions from disassembly during development<sup>28</sup> and provides the mechanical  
62 tugging force necessary for AJ reinforcement<sup>29</sup>. In endothelial cells, NMII is recruited early in  
63 filopodia-mediated bridge bundles and its activity is required for accumulation of VE-cadherin  
64 in nascent AJs<sup>30</sup>. In epithelial cells, NMII favours local concentration of E-cadherin at cell-cell  
65 contacts<sup>31,32</sup> and it is enriched at the edges of elongating junctions where it drives contact  
66 expansion in response to RhoA activity<sup>17,18</sup>.

67 In mammalian cells, NMII heavy chains exist as three different isoforms: NMIIA, NMIIB and  
68 NMIIC encoded by *MYH9*, *MYH10* and *MYH14* genes respectively<sup>33,34</sup>. NMIIA and NMIIB are  
69 widely expressed whereas NMIIC is not detected in several tissues<sup>35</sup>. Despite structural  
70 similarities, NMIIA and NMIIB isoforms have been assigned both redundant and specific  
71 functions depending on cell types and processes<sup>36</sup>. NMIIA and NMIIB exhibit different ATPase  
72 activities and actin-binding properties<sup>37–40</sup>, in addition to their specific C-terminal tails that  
73 confer them unique functions<sup>41–43</sup>. These two isoforms can exist as activated monomers in  
74 cells, but they can also co-assemble as homotypic and heterotypic filaments<sup>44,45</sup>. NMIIA and  
75 NMIIB play both unique and overlapping roles *in vivo*<sup>46–51</sup>. In cells migrating on 2D surfaces,  
76 NMIIA localizes at the cell front, limits lamellipodial protrusive activity and reduces 2D cell  
77 migration speed by regulating focal adhesions dynamics and traction forces<sup>52–55</sup>. NMIIB  
78 localizes at the cell rear and is required for front-back polarity and tail retraction<sup>53–61</sup>. In 3D,  
79 NMIIA favours cell displacement<sup>52–55,62</sup> while NMIIB drives nuclear translocation<sup>63</sup>. NMIIB also  
80 plays a determinant role in durotaxis<sup>64</sup>.

81 While the roles of NMII isoforms in cell motility on ECM have been extensively studied, very  
82 little is known on their respective functions in AJs organization. Smutny and collaborators have  
83 reported that NMIIA and NMIIB both localize at apical junction complexes of polarized MCF-7  
84 cells. Upon specific isoform expression silencing, they further proposed that NMIIA may favour

85 the accumulation of E-cadherin in the AJ belt while NMIIB may stabilize the associated  
86 perijunctional actin ring<sup>32</sup>. Efimora and collaborators reported an association of NMIIA with  
87 contractile actin bundle running parallel to linear AJ in endothelial cells, but failed to precisely  
88 localize NMIIB<sup>65</sup>. Here we questioned the unexplored functions of NMII isoforms in epithelial  
89 AJ biogenesis using an *in vitro* system based on chemically-switchable micro-patterns,  
90 whereby we can control the time and location of a new contact forming between two single  
91 cells on a matrix-coated surface.

92

## 93 **Results**

### 94 ***In vitro* system for the study of early cell-cell contacts**

95 In order to study early AJ biogenesis, pairs of GFP-E-cadherin expressing MDCK cells were  
96 plated on arrays of 5  $\mu$ m-distant fibronectin-coated micro-patterns surrounded by switchable  
97 cytopulsive surfaces<sup>66</sup>. After complete spreading, the confinement imposed by the micro-  
98 patterns was released by addition of an RGD-motif containing modified peptide that switched  
99 the surface surrounding patterns from a cytopulsive to an adhesive surface (Supplementary  
100 Fig. 1a). Junction biogenesis was monitored by confocal spinning disk microscopy (Fig. 1a,  
101 Supplementary Video 1). Within 2 hours, cells extended lamellipodia in random directions and  
102 approximately 50 % of the pairs of cells contacted within 12 hours. The junction extended  
103 reaching a plateau at 40-45  $\mu$ m length in around 3 hours (Fig. 1b,d). As previously described<sup>17</sup>,  
104 GFP-E-cadherin accumulated at the edges of the junction (Fig. 1b). Once reaching this  
105 maximal length, the junction was maintained while showing dynamic retraction-elongation  
106 events (Fig. 1b). Importantly, in 98 +/- 2 % of the cases, cell-cell contacts were stable and  
107 lasted above 3 hours and up to 22 hours (Fig. 1b,e). Analysis of the nucleus-centrosome axis  
108 relative to the junction axis showed a relocalization of the centrosome towards the lamellipodia  
109 opposite to the cell-cell contact within one hour (Supplementary Fig. 1b,c), as previously  
110 reported in different systems and cell types<sup>67-70</sup>. However, although MDCK cells antipolarized  
111 in the doublet as if they were initiating a contact inhibition of locomotion, they remained  
112 attached to each other in contrast to more mesenchymal cells that proceed with cell separation

113 following repolarization<sup>71</sup>. Together, these observations show that this *in vitro* model system is  
114 suitable for the study of early cell-cell contacts at high spatial-temporal resolution.

115

### 116 **NMIIA and NMIIB orchestrate junction biogenesis**

117 To evaluate the involvement of NMII-generated actomyosin contractility in junction biogenesis,  
118 we monitored junction formation in cells treated with the ROCK inhibitor Y27632  
119 (Supplementary Video 2). Y27-treated cells exhibited irregular junctions with small digitations  
120 and empty spaces and did not elongate as much as in control cells (Fig. 1c,d). They were  
121 strongly affected in their capacity to maintain cell-cell contacts, half of the doublets separating  
122 before 3 hours (Fig. 1e, f and Supplementary Video 2). Similar results were observed after  
123 treating cells with the NMII ATPase activity inhibitor blebbistatin (data not shown) indicating  
124 that NMII activity is required for proper junction elongation and stabilization. Furthermore, NMII  
125 was required for the centrosome repolarization, as we could not observe any preferential  
126 orientation of the nucleus-centrosome axis in Y27-treated doublets (Supplementary Fig. 1d).  
127 Next, we explored the involvement of the two NMII isoforms in junction biogenesis. NMIIA has  
128 been reported to be by large the major isoform of NMII expressed in MDCK cells<sup>35</sup>. However,  
129 immunostainings revealed that the three isoforms, NMIIA, NMIIB and NMIIIC could be detected  
130 in MDCK cells. NMIIA and NMIIIC fully co-localized to similar structures, which was not the case  
131 for NMIIB (Supplementary Fig. 3a,b). For these reasons, we decided to focus on NMIIA and  
132 NMIIB isoforms. Expression of each isoform was silenced in GFP-E-cadherin MDCK cells by  
133 stable transfection of specific ShRNA encoding plasmids, leading to an inhibition of expression  
134 of around 60-70% (Fig. 2a,b and Supplementary Fig. 2a,b). The analysis of cell-cell contact  
135 formation in cell doublets by live-imaging (Supplementary Video 3) revealed that NMIIB knock-  
136 down (NMIIB KD) cells formed and extended intercellular junctions very similar to control (Ctrl)  
137 cells (Fig. 2c-f). In contrast, almost half of NMIIA knock-down (NMIIA KD) cell doublets were  
138 unable to sustain contacts more than 3 hours, and when they did so, these contacts remained  
139 shorter than for Ctrl or NMIIB KD cell doublets (Fig. 2c-f), similar to what was observed in Y27-  
140 treated cell doublets. NMIIB KD doublets, despite their ability to maintain cell-cell contacts for

141 longer times, formed twisted junctions that were significantly less straight than Ctrl and NMIIA  
142 KD cells and deviated significantly more from their initial orientation (Fig. 2g,h). These defects  
143 in NMIIB KD cells were already observed at early stages of junction biogenesis and were  
144 associated to the formation of large extensions of junctional membrane (Fig.2i, arrows).  
145 Together, these results show that both NMIIA and NMIIB are required for the biogenesis of  
146 stable AJs, albeit with different contributions; NMIIA favours temporal stability whereas NMIIB  
147 ensures the straightness and spatial stability of the junctions.

148

### 149 **NMIIB localizes to a junctional actin pool distinct from perijunctional NMIIA-associated** 150 **contractile fibres**

151 To better understand the respective roles of NMIIA and NMIIB in junction biogenesis, we next  
152 studied their subcellular localization at nascent cell-cell contacts in cell doublets.  
153 Immunostainings revealed that the localization of the two isoforms was mutually exclusive.  
154 Anti-NMIIA antibodies stained actin bundles that were parallel to the junction but set at 1 to 2  
155  $\mu\text{m}$  from it. NMIIA was also found associated to actin cables parallel to the cortex of non-  
156 junctional membranes (Fig. 3a,b,e and Supplementary Fig. 3a) in addition its association to  
157 the classical ventral stress fibres. In contrast, NMIIB immunostaining was associated with the  
158 junctional plasma membranes as well as with a cytoplasmic network (Fig. 3c-e and  
159 Supplementary Fig. 3b), that was identified as the vimentin intermediate filament network as  
160 reported by Menko and colleagues<sup>72</sup> in lens epithelial cells. Importantly, the localization of  
161 each isoform was not affected by the silencing of the other isoform (Supplementary Fig.3c).  
162 Smutny and colleagues previously reported that NMIIA and NMIIB both localized to apical  
163 epithelial junctions in polarized MCF-7 cells<sup>32</sup>. Given that, we followed the localization of both  
164 isoforms during apico-basal polarization of MDCK cells (Fig. 3f and Supplementary Fig. 3d).  
165 After 3 days of culture, confluent MDCK cells started to develop an apico-basal polarization  
166 and the two isoforms colocalized to apically positioned *zonulae adherens* colocalizing with E-  
167 cadherin as previously reported in MCF-7 cells<sup>32</sup>. At the ventral side, they were associated to  
168 stress fibres. However, we confirmed a different localization of NMIIB and NMIIA in sub-

169 confluent cell clusters after one day of culture. NMIIA was still associated to stress fibres while  
170 NMIIB colocalized with E-cadherin at cell-cell contacts. These differential distributions at the  
171 early stages of AJ formation were not specific to MDCK cells, and were observed as well in  
172 small clusters of Caco2 cells (Supplementary Fig.3e). Considering recent findings showing a  
173 possible interaction between NMIIB and  $\alpha$ -catenin<sup>73</sup>, we hypothesized that NMIIB could be  
174 recruited to the junction through  $\alpha$ -catenin/E-cadherin complexes. Accordingly, in  $\alpha$ -catenin KD  
175 MDCK cells<sup>74</sup>, NMIIB was relocalized to NMIIA-enriched stress fibres and circumnuclear actin  
176 cables (Fig. 3e), indicating that  $\alpha$ -catenin is required for NMIIB junctional recruitment.

177 To better characterize the organization of the actomyosin cytoskeleton at nascent AJs, co-  
178 stainings of NMIIA, NMIIB, F-actin and  $\beta$ -catenin performed on control MDCK cells were  
179 imaged using structured illumination microscopy (SIM). NMIIA was associated to thick F-actin  
180 bundles running parallel to, and located a few microns away from the junctional membranes  
181 (Fig. 4a), as reported for NMIIA localization in linear junctions of endothelial cells<sup>30,65</sup>. We  
182 confirmed at this resolution that NMIIA did not colocalize with  $\beta$ -catenin-labelled cadherin-  
183 catenin complexes. Interestingly, NMIIA appeared distributed on these actomyosin bundles in  
184 sarcomere like structures as described before in other cellular contexts<sup>75,76</sup>. These NMIIA  
185 labelled structures were almost free of NMIIB staining. NMIIB junctional staining colocalizing  
186 with  $\beta$ -catenin was associated with a 200 nm to 1  $\mu$ m thick fuzzy F-actin network (Fig. 4a,b).  
187 This junctional F-actin network was labelled by both Arp2/3 and cortactin (Fig. 5b,c) thus  
188 corresponding to an Arp2/3-nucleated branched actin meshwork. Looking at short junctions  
189 that probably corresponded to nascent cell-cell contacts, we could also observe the strong  
190 enrichment of NMIIB and the exclusion of NMIIA at the contact zone (Fig.4c,d).

191 Altogether, these observations reveal that early during AJ biogenesis, NMIIB is exclusively  
192 associated to a junctional Arp2/3-nucleated F-actin, structurally distinct from the perijunctional  
193 contractile NMIIA-associated actin bundles running parallel to the junction.

194

195

196

197 **NMIIA regulates the organization of perijunctional actin bundles while NMIIB supports**  
198 **the maintenance of the junctional branched actin layer**

199 Based on these observations, we subsequently explored the possibility that NMIIB and NMIIA  
200 could differentially regulate actin assembly at the junction, thereby maintaining its structural  
201 integrity. Using SIM microscopy, we analyzed the organization of junctional actin cytoskeleton  
202 in NMIIA KD and NMIIB KD cells. NMIIA KD cells exhibited shorter actin bundles running  
203 parallel to the junction, while their junctional F-actin meshwork was comparable to the one of  
204 Ctrl cells, both in terms of morphology and cortactin staining (Fig. 5b,c and Supplementary Fig.  
205 4). In contrast, NMIIB KD cells presented a strongly enlarged area of junctional F-actin  
206 meshwork colocalizing with  $\beta$ -catenin that corresponded to overlapping membrane extensions  
207 stained with cortactin (Fig.5b,c and Supplementary Fig.4). In addition, while they retained  
208 some of the perijunctional actin bundles, we could observe numerous oblique actin bundles  
209 directed toward the junction (Fig.5c and Supplementary Fig.4). These results show that NMIIA  
210 supports the organization of perijunctional actin bundles while NMIIB is required for the  
211 regulated assembly of junctional branched F-actin that couples perijunctional bundles to the  
212 plasma membrane.

213 The Arp2/3-nucleated actin network at the *zonula adherens* has been shown to regulate  
214 junctional tension in epithelial monolayers<sup>77</sup>. On the other hand, junctional tension has been  
215 shown to associate with the presence of  $\alpha$ -catenin molecules under open conformations<sup>78,79</sup>.  
216 Moreover, a direct link between  $\alpha$ -catenin and NMIIB has been reported<sup>73</sup>, suggesting that  
217 NMIIB recruitment,  $\alpha$ -catenin molecular unfolding and regulation of Arp2/3-dependent  
218 branched actin polymerization could be tightly linked. Thus, we performed immunostainings  
219 with the  $\alpha$ 18 monoclonal antibody recognizing the open conformation of the protein<sup>79</sup>.  
220 Strikingly, the ratio of  $\alpha$ 18 on total  $\alpha$ -catenin junctional staining was decreased by four times  
221 in NMIIB KD cells compared to Ctrl cells, while it was not affected in NMIIA KD cells. This  
222 suggests that junctional  $\alpha$ -catenin molecules were significantly turned to the closed  
223 conformational state in NMIIB KD cells (Fig.5d-f). In contrast, the total  $\alpha$ -catenin junctional



224 levels were significantly reduced in NMIIA KD cells, as shown by others<sup>31,32</sup>. Taken together,  
225 these results strengthen complementary contributions for NMIIB and NMIIA where NMIIB is  
226 the main isoform required for the organization of junctional branched actin and NMIIA for  
227 organization of perijunctional contractile actin fibres.

228

229 **NMIIA is required for the generation of forces at E-cadherin adhesions while NMIIB**  
230 **favours their transmission through F-actin anchoring**

231 The formation of cell-cell junctions in cell doublets is concomitant with the formation of cell-  
232 matrix adhesions and the tugging force applied on cell-cell contacts must be compensated by  
233 traction of the cells on cell-matrix adhesion complexes<sup>29,80-82</sup>. To further understand the  
234 contributions of NMII isoforms in junction biogenesis, we thus experimentally decoupled these  
235 two adhesion systems. We first investigated the role of NMII isoforms in cell-matrix adhesion  
236 by seeding single Ctrl, NMIIA KD and NMIIB KD cells on fibronectin-coated glass. NMIIA KD  
237 cells spread 1.7 times more than Ctrl and NMIIB KD cells on fibronectin and their actin  
238 cytoskeleton was highly perturbed exhibiting a strong decrease in ventral stress fibres and  
239 cortical actin bundles together with an enlargement of their lamellipodia (Fig. 6a,b). NMIIA KD  
240 cells also formed significantly less focal adhesions (Fig. 6a,c). In contrast, NMIIB KD cells  
241 showed no defect in actin organization, cell spreading or focal adhesion formation (Fig. 6a-c).  
242 Next, we measured by TFM the magnitude of traction forces applied by single cells on  
243 deformable fibronectin-coated 30 kPa PDMS gels. NMIIA KD cells exerted lower traction forces  
244 than Ctrl cells as reported by others<sup>55,61</sup>. NMIIB KD cells, on the contrary, did not show any  
245 defect in traction force generation on this substratum (Fig. 6d,e). These results, in agreement  
246 with previous studies<sup>55,57</sup>, show that NMIIA is the isoform regulating cell spreading, cell  
247 adhesion, traction force generation and organization of contractile actin structures on  
248 fibronectin. In contrary NMIIB is not contributing at all to the cell-matrix adhesion, focal  
249 adhesion formation, actomyosin reorganization and traction forces on fibronectin.

250 To explore the contribution of NMII isoforms to E-cadherin-mediated cell-cell adhesion *per se*,  
251 we seeded single cells on E-cadherin-coated substrates (Fig. 7a,b). After 6 hours, Ctrl and

252 NMIIA KD cells had spread similarly with mean areas of  $1178 \pm 40 \mu\text{m}^2$  and  $1031 \pm 37 \mu\text{m}^2$   
253 respectively, while NMIIB KD cells spreading was significantly reduced (mean area =  $515 \pm 21$   
254  $\mu\text{m}^2$ ) (Fig. 7a,c). Ctrl cells organized thick circumnuclear actin arcs, as well as radial actin fibres  
255 connected to peripheral  $\beta$ -catenin clusters (Fig. 7a), as previously described<sup>83,84</sup>. NMIIA KD  
256 cells, while spreading as Ctrl cells on E-cadherin and forming cadherin clusters in similar  
257 numbers, lacked the circumnuclear actin arcs (Fig. 7a,c,d). In contrast, NMIIB KD cells kept  
258 the organization of circumnuclear actin arcs, but were depleted of radial actin bundles, did not  
259 form significant  $\beta$ -catenin clusters and failed to spread on E-cadherin (Fig. 7a,c,d). This data  
260 indicated that NMIIB, but not NMIIA, plays a major role in the clustering and stabilization of E-  
261 cadherin/catenin complexes that in turn promote cell spreading. Our findings also suggest that  
262 NMIIA, but not NMIIB, is required for the formation of contractile actin fibres that apply traction  
263 forces on the cadherin adhesions. We thus measured the capacity of these cells to transmit  
264 forces through E-cadherin complexes by TFM, seeding them on E-cadherin-coated 15 kPa  
265 PDMS elastic gels. Compared to Ctrl cells, NMIIA KD cells exhibited very low forces on E-  
266 cadherin substrate (Fig.7e,f), confirming that NMIIA generates the forces transmitted to E-  
267 cadherin adhesions. NMIIB KD cells, that failed to cluster cadherin/catenin complexes, also  
268 generated lower traction forces than Ctrl cells, albeit to a lesser extent than NMIIA KD cells  
269 (Fig. 7e, f). Even though both myosin isoforms contribute to cell-generated forces on E-  
270 cadherin substratum, they have complementary contributions. NMIIA is required for the  
271 formation of stress fibres while NMIIB would rather regulate the transmission of force and the  
272 coupling of actin stress fibres to the cadherin-catenin complexes.

273

#### 274 **NMIIA and NMIIB are required for proper organization of inter-cellular junctional stress**

275 To directly determine how NMIIA and NMIIB contribute to traction force generation and  
276 transmission during AJ biogenesis, we mapped traction forces before and after cell-cell contact  
277 formation in cell doublets. Hotspots of traction forces were generated at the periphery of the  
278 doublet where lamellipodia arise (Fig.8a). As expected from the TFM data obtained with single  
279 cells seeded on fibronectin, NMIIA KD doublets, compared to Ctrl and NMIIB KD ones,

280 exhibited very low traction forces both before and after cell-cell contact formation (Fig. 8a-c).  
281 NMIIB KD doublets developed traction forces similar in magnitude to those developed by Ctrl  
282 ones, with however different patterns. Hotspots of forces frequently appeared in the junctional  
283 area in NMIIB KD doublets that were generally absent in Ctrl and NMIIA doublets (Fig. 8a). We  
284 quantified these differences by analysing the spatial repartition of forces in the peripheral and  
285 central subdomains of the junction, and their orientation relative to main junction axis (parallel,  
286  $F_{//}$ , and perpendicular,  $F_{\perp}$ , components). NMIIB KD doublets generated higher  $F_{\perp}$  in the central  
287 part of the junction and lower values of  $F_{//}$  (albeit not significantly) with respect to Ctrl doublets  
288 in both the peripheral and the central part of the junction (Supplementary Fig.5a-c). These  
289 results show that NMIIB plays an important role in the repartition of traction forces under the  
290 junction and that NMIIA is essential for the generation of traction forces in general. We next  
291 quantified the capacity of NMIIA KD and NMIIB KD cells to transmit forces across the junction.  
292 Following Newton's laws, the net traction force exerted by an isolated doublet is zero, up to  
293 the measurement noise. Conversely, the net traction forces exerted by each of the two cells  
294 are equal in magnitude and opposite in direction, compensating exactly<sup>29,80,81</sup>. We thus  
295 calculated the resultant vectorial sum of forces per cell (Fig. 8b). In all conditions, the resultant  
296 force per cell before contact was within the level of noise as expected for isolated cells and  
297 increased within 30 minutes after contact to reach a plateau, attesting the capacity of all three  
298 cell lines to transmit intercellular tugging forces across the junction (Fig.8b,c). However, in  
299 NMIIA KD cells, the resultant forces per cell at the plateau was significantly lower than in Ctrl  
300 and NMIIB KD cell doublets (Fig.8c), which is consistent with the inability of these cells to apply  
301 strong traction forces on fibronectin substratum.

302 Using traction force measurement data, we then computed the intracellular stress in the cell  
303 doublets<sup>85</sup> (Fig. 8a). The in-plane stress is represented by a tensor with three independent  
304 components: two components of normal stress denoting either tension (positive values) or  
305 compression (negative values) along the corresponding directions, and one component of  
306 shear stress, except in the basis of the tensor's principle directions, where there is no shear  
307 stress. The ellipse representation in Figure 8a shows that the stress is highly anisotropic, and

308 the cells are mostly under tension except for regions of very small compression associated to  
309 high tension in the other direction. The NMIIA KD cells show lower tension, consistent with the  
310 lower amount of traction forces they exert. We focused on the normal stress within the region  
311 of cell-cell junction, as AJs provide a mechanical link that drives transmission of forces between  
312 cells and thus organize inter-cellular stress<sup>85,86</sup>. We thus computed the perpendicular ( $\sigma_{\perp}$ ) and  
313 parallel ( $\sigma_{\parallel}$ ) components of normal stress relative to the junction axis, which characterise the  
314 tension across and along the junction respectively. Within 30 minutes after contact formation,  
315 the junction was submitted to a rise of  $\sigma_{\perp}$  in all three cell lines, consistently with the emergence  
316 of a cell-cell tugging force (Supplementary Fig.5d,e). However, in Ctrl cells, the normal stress  
317 parallel to the junction  $\sigma_{\parallel}$ , remained higher than  $\sigma_{\perp}$  on average (Fig.8d). Strikingly, this was not  
318 the case in NMIIIB KD and NMIIA KD cells that exhibited on average equal amounts of normal  
319 stress parallel and perpendicular to the junction, denoting a more isotropic distribution of  
320 junctional tension (Fig. 8d).

321 Altogether, these results show that NMIIA and NMIIIB are both required for mechanical integrity  
322 of the junction. NMIIA is necessary for generation of a high junctional inter-cellular stress  
323 through production of tugging forces compensated by traction applied at cell-matrix adhesions.  
324 NMIIIB, on the other hand, is necessary for the establishment of an anisotropic stress at the  
325 junction, sustaining high tension along the cell-cell interface.

326

## 327 **Discussion**

328 Here, we explore for the first time the involvement of NMII isoforms during early steps of  
329 epithelial junction formation. We show that NMIIA and NMIIIB associate with distinct pools of  
330 actin and cooperate to initiate the formation of epithelial AJ before the acquisition of the apico-  
331 basal polarization (See model, Supplementary Fig.6).

332 While NMIIA associated to actin bundles parallel to- and distant from the junction, NMIIIB was  
333 sitting at junctional membranes in association with an Arp2/3-branched actin network, distinct  
334 from NMIIA-associated actin. The existence of two distinct actin networks at *adherens*  
335 junctions had already been observed in early junctions between hepatocytes<sup>18</sup> and in

336 endothelial cells where VE-cadherin was shown to colocalize with Arp2/3 complex-positive  
337 actin networks in-between distal actin-NMII bundles<sup>65</sup>. The localization of NMIIA is reminiscent  
338 of what has been observed previously in linear AJ of endothelial cells<sup>65</sup>. Strikingly, we show  
339 here an unexpected association of NMIIIB with the Arp2/3-dependant branched actin that link  
340 the junctional membrane to NMIIA-associated perijunctional contractile actin bundles. Our data  
341 support a role of this isoform in organizing this branched network and its association to  
342 adhesion complexes on one side and perijunctional actin bundle on the other side. We believe  
343 that these are properties common to the early stage of AJ formation in many cell types<sup>18,65</sup>, that  
344 then mature to elaborate *zonulae adherens* in epithelial cells where both actin organizations,  
345 associated with their respective NMII isoforms, persist but become tightly packed to the  
346 junctional membrane<sup>14,32</sup>. Interestingly, in the absence of  $\alpha$ -catenin KD, the localization of  
347 NMIIIB was not restricted any more to junctional membranes in early epithelial junctions.  
348 Instead, NMIIIB co-assembled with NMIIA on the same actin fibres, likely in heterotypic  
349 minifilaments, as observed in previous studies<sup>36,61</sup>, indicating that  $\alpha$ -catenin is responsible for  
350 the junctional recruitment of NMIIIB, as reinforced by a recent publication reporting NMIIIB and  
351  $\alpha$ -catenin interaction in glioblastoma cells<sup>73</sup>.

352 These distinct localization patterns at early junctions are correlated to differential contributions  
353 of NMIIA and NMIIIB in junction biogenesis. Upon contact formation, NMIIA KD cells were  
354 unable to elongate the junction and to sustain long-lived cell-cell contacts. They also lacked  
355 the capacity to produce traction forces on E-cadherin-coated substrates. Our observations thus  
356 identify NMIIA as the major isoform responsible for the NMII-dependent mechanical tugging  
357 force required for junction growth<sup>29</sup>. This was confirmed by traction force and stress analysis  
358 data revealing a decrease of the forces as well as a reduction of both parallel and perpendicular  
359 stresses at the junction for NMIIA KD cells. In contrast, NMIIIB KD cells transmitted elevated  
360 tugging forces and maintained cell-cell contacts, but their junctions appeared enlarged and  
361 twisted with a lower parallel stress. These results are remarkable given that NMIIIB was found  
362 to be expressed 100 times less than NMIIA in MDCK cells<sup>35</sup>. NMIIIB was required for efficient

363 E-cadherin clustering on E-cadherin substrates and for the connection of the contractile actin  
364 network to these clusters. NMIIB was also required for the proper organization and spatial  
365 restriction of the Arp2/3-dependent branched actin in the junctional area. Unexpectedly, NMIIB,  
366 and not NMIIA, was the main isoform responsible for the maintenance of  $\alpha$ -catenin in an  
367 opened conformation.

368 Given that E-cadherin complexes have been shown to biochemically interact with both  
369 Arp2/3<sup>16,77</sup> and NMIIB<sup>73</sup>, one hypothesis could be that NMIIB and Arp2/3 are both recruited to  
370 E-cadherin/catenin complexes upon cell-cell contact initiation. NMIIB could thus serve as a  
371 cross-linker of the junctional actin network. Hence, the absence of NMIIB may induce a local  
372 softening of AJs which in turn leads to reduced extension of AJs and keeps  $\alpha$ -catenin in a  
373 closed conformation. It is also in agreement with a previous study showing that Arp2/3-  
374 nucleated actin network at the *zonula adherens* regulates junctional tension and integrity<sup>77</sup>.  
375 NMIIB by associating both with cadherin-catenin complexes and the branched actin could  
376 somehow rigidify and regulate the thickness of this F-actin cushion sitting between the  
377 membrane and the contractile actin fibres associated to NMIIA. This could be achieved through  
378 the specific biochemical properties of NMIIB towards actin that provide it with the capacity to  
379 transmit tension within actin filaments at low energetic cost<sup>39,87,88</sup>. Along this line, it is striking  
380 to note that we never observe in early AJ any sign of organization of NMIIB in minifilaments in  
381 the junctional area as observed for NMIIA in perijunctional actin bundles.

382 Inter-cellular stress is generated at cell-cell adhesions, although this remained poorly  
383 characterized<sup>80,81</sup>. Here, we evaluated the amount and the orientation of intercellular stress  
384 generated during junction biogenesis. Within one hour of cell-cell contact, an anisotropic inter-  
385 cellular stress appeared at the junction, with a preferential orientation parallel to the junction,  
386 favouring the elongation and the stability of the nascent junction. Both isoforms were required  
387 for proper establishment and orientation of this inter-cellular stress. NMIIA silencing had a  
388 global impact on the amount of inter-cellular stress generated, which was not surprising given  
389 its role on traction force production both at cell-matrix and cell-cell adhesions. On the other  
390 hand, NMIIB favoured the production of a higher parallel inter-cellular stress, probably by

391 driving the crosslinking and stiffening of the junctional actin network that couples the  
392 perijunctional contractile actin to the plasma membrane.

393 In conclusion, we demonstrate here that both NMIIA and NMIIB contribute to the early steps  
394 of AJ biogenesis and are necessary for mechanical integrity of the junction, albeit implicated  
395 in very different aspects of adhesion complexes and actin pools organization. These findings  
396 open new avenues in the understanding of how distinct pools of actomyosin, associated to  
397 different myosin isoforms, built up and integrate mechanical forces to regulate adherens  
398 junction remodelling and intercellular stress in vertebrate cells in order to achieve large scale  
399 tissue remodelling during embryogenesis and tissue repair.

400

## 401 **Methods**

### 402 **Antibodies and reagents**

403 The following primary antibodies were used: rabbit anti-NMIIA polyclonal (Biolegend) or  
404 mouse anti-NMIIA monoclonal antibodies (Abcam, for co-immunostainings with anti-NMIIB  
405 antibodies); rabbit anti- $\beta$ -catenin polyclonal (Sigma-Aldrich) or mouse anti- $\beta$ -catenin  
406 monoclonal (BD Biosciences) antibodies; recombinant rabbit anti-paxillin monoclonal  
407 antibody (Abcam); mouse anti-GAPDH (ProteinTech), mouse anti-Arp3 (Sigma-Aldrich) and  
408 mouse anti-E-cadherin (BD Biosciences) antibodies; rabbit anti- $\alpha$ -catenin polyclonal (Sigma-  
409 Aldrich) and rabbit anti-NMIIB polyclonal (Biolegend) antibodies; rat anti- $\alpha$ 18-catenin  
410 monoclonal antibody (generously provided by A. Nagafuchi (Kumamoto University, Japan)<sup>89</sup>.  
411 Alexa488-, Alexa568- and Alexa647-conjugated secondary antibodies were purchased from  
412 ThermoFisher, Alexa (488 or 555 or 647) -coupled phalloidins from Invitrogen and Hoechst  
413 34580 from ThermoFisher. Horseradish peroxidase-coupled anti-mouse IgGs (Sigma-  
414 Aldrich) and anti-rabbit IgGs (Pierce) were used for immunoblotting. Mitomycin C and Y-  
415 27632 dihydrochloride were purchased from Sigma-Aldrich. The APP (Azido-Poly-lysine Poly  
416 (ethylene glycol)) and the BCN-RGD peptide (BCN: bicyclo[6.1.0]- nonyne, coupled to RGD:  
417 peptide sequence Arg-Gly-Asp) were prepared as previously described<sup>90</sup>.

418 **Cell culture**

419 MDCK (ATCC CCL-34) and C2C12 (ATCC CRL-1772) cells originate from the American  
420 Type Culture Collection (ATCC). E-cadherin-GFP<sup>91</sup> and  $\alpha$ -catenin KD MDCK cell lines<sup>92</sup> were  
421 kindly provided by W.J. Nelson (Stanford University, Palo Alto). Caco2BBE cells (ATCC  
422 HTB-37) were kindly provided by S. Robine (Institut Curie/CNRS, Paris). Cells were  
423 maintained at 37°C, 5% CO<sub>2</sub> in DMEM (containing Glutamax, High Glucose and Pyruvate,  
424 Life Technologies) supplemented with 100 µg/mL Penicillin/Streptomycin (Life Technologies)  
425 and Foetal Bovine Serum (Life Technologies) at 10% for MDCK and C2C12 cells and at 20%  
426 for Caco2 cells. Ecadherin-GFP cells and  $\alpha$ -catenin KD MDCK cells were maintained in  
427 media containing 5 µg/ml geneticin (Life Technologies).

428

429 **Generation of isoform-specific NMII knock-down MDCK cell lines**

430 For generation of isoform-specific NMII Heavy chain knock-down cells, isoform-specific  
431 shRNA sequences, inserted in a back bone standard vector pLKO.1-puro, were designed  
432 and synthesized by Sigma-Aldrich technical services, based on the sequences of *Canis lupus*  
433 *familiaris* transcripts for MYH9 (NMIIA, transcript ID: ENSCAFT00000002643.3) and MYH10  
434 (NMIIB, transcript ID: ENSCAFT000000027478). The sequences used were the following:  
435 TTGGAGCCATACAACAATAC for NMIIA and TCGGGCAGCTCTACAAAGAAT for NMIIB.  
436 As a control, the pLKO.1-puro non-mammalian shRNA Control Plasmid DNA was used  
437 (SHC002, Sigma-Aldrich). Two million Ecadherin-GFP MDCK cells were electroporated  
438 (Neon Transfection System Invitrogen) with 3-5 µg shRNA encoding plasmids in one pulse of  
439 20 ms at 1650 V. Twenty four hours later, cells were put under selection pressure by adding  
440 puromycin (2.5 µg/ml) in media. After 10 days, single cells were sorted in 96 well plates by  
441 flow cytometry using Influx 500 sorter-analyzer (BD BioSciences) and clonal populations then  
442 selected based on NMII isoform expression levels by immunoblot and immunofluorescence.



443 Control, NMIIA KD and NMIIB KD MDCK cells were maintained in media containing geneticin  
444 (5 µg/ml) and puromycin (2.5 µg/ml).

445 For simultaneous visualization of E-cadherin and centrosome, Ecadherin-GFP MDCK cells  
446 were transiently transfected with a plasmid driving the expression of RFP-Pericentrin (kindly  
447 provided M. Coppey, Institut Jacques Monod, Paris), using the protocol described above,  
448 one or two days before the experiment. m-Cherry cortactin plasmids (kindly provided by  
449 Alexis Gautreau, Biochemistry laboratory, Ecole polytechnique, France) were transfected in  
450 Control, NMIIA KD and NMIIB KD MDCK cells and the m-cherry expressing cell population  
451 was sorted by flow cytometry using Influx 500 sorter-analyzer (BD BioSciences).

452

### 453 **Western blotting**

454 Confluent cells were lysed in 100 mM Tris pH 7.5, 150 mM NaCl, 0.5% NP40, 0.5% Triton-  
455 X100, 10% glycerol, 1X protease inhibitor cocktail (Roche) and 1X phosphatase inhibitor  
456 (Phosphostop, Roche) for 20 minutes at 4°C. Insoluble debris were centrifuged for 15  
457 minutes at 13000 g and supernatants were recovered. Protein concentration was quantified  
458 by Bradford assay (BioRad), SDS PAGE and electrotransfer were performed on 4-12% Bis-  
459 Tris gel (Novex) using mini gel tank and iBlot transfer systems (Invitrogen). Non-specific sites  
460 were blocked with 5% non-fat dry milk in PBS 0.1% Tween 20. Primary antibodies were  
461 diluted (1/1000) in PBS 0.1% Tween 20 and incubated overnight at 4°C. After three washes  
462 in PBS 0.1% Tween 20, secondary HRP antibodies diluted in PBS 0.1% Tween 20 (1/10000)  
463 were incubated for 1 hour and washed 3 times with PBS 0.1% Tween 20. Immunocomplexes  
464 of interest were detected using Supersignal West Femto maximum sensitivity substrate  
465 (ThermoFisher) and visualized with ChemiDoc chemoluminescence detection system  
466 (Biorad). Quantification of Western blots by densitometry was performed using the Gel  
467 analyzer plug in from Image J. GAPDH was used as a loading control to normalize the  
468 quantification.

## 469 **Immunofluorescent staining**

470 Cells were fixed with pre-warmed 4% formaldehyde in PBS for 15 min at RT and then  
471 washed 3 times with PBS, followed by permeabilization and blocking with 0.05%  
472 saponin/0.2% BSA in PBS for 15 minutes at RT. The primary antibodies diluted (1/100) in  
473 Saponin/BSA buffer were then incubated overnight at 4°C. After 3 washes in Saponin/BSA  
474 buffer, the samples were incubated with secondary antibodies and, when indicated, Alexa-  
475 coupled phalloidin, diluted at 1/200 in the same buffer for 1 hour at RT. The preparations  
476 were washed twice in Saponin/BSA buffer, once in PBS, and then mounted with the DAPI  
477 Fluoromount-G mounting media (Southern Biotech).

478

## 479 **Preparation of fibronectin-coated and cadherin-coated substrates**

480 For fibronectin coating, glass coverslips were first cleaned by sonication in 70% ethanol and  
481 air dried. They were coated for 1 hour with 50 µg/mL human plasma fibronectin (Merck  
482 Millipore) diluted in PBS and washed three times with PBS.

483 The protocol for E-cadherin coating was inspired from a previous study by Lee and  
484 colleagues<sup>93</sup>. Briefly, the cleaned glass coverslips were silanized with 10% 3-aminopropyl  
485 triethoxysilane (APTES, Sigma-Aldrich) in 100% ethanol for 10 minutes at RT, washed once  
486 in 100% ethanol and dried at 80°C for 10 minutes. The surface was then functionalized by  
487 incubation for 1 hour with 2 mM EDC-HCl (Thermo Scientific) / 5 mM NHS (Sigma-Aldrich)  
488 and 1 µg of recombinant human E-cadherin (R&D systems). Coverslips were then washed  
489 two times with PBS.

490 Cells were plated at very low density (typically 1 10<sup>5</sup> cells for a 32 mm diameter coverslip) on  
491 the coated coverslips in complete medium containing 10 µg/mL mitomycin C. After 1 hour  
492 incubation at 37°C, the preparations were washed twice with complete media and incubated  
493 2-6 hours or overnight at 37°C before imaging or fixation, for cadherin coating and fibronectin  
494 coating, respectively.

## 495 **Preparation of switchable micro-patterns and imaging**

496 Micropatterns were made as previously described with some modifications<sup>94</sup>. Briefly, air dried  
497 cleaned glass coverslips were activated with deep UV for 5 minutes, and coated for at least 1  
498 hour with the repellent compound APP (0.1mg/ml in HEPES 10 mM pH7.4). After 3 washes  
499 with deionized water, the coverslips were exposed to deep UV for 7 minutes through a  
500 chrome photomask. The coverslips were then washed with deionized water three times,  
501 coated with 50 µg/mL human plasma fibronectin for 1 hour and washed twice with deionized  
502 water and once with PBS. When indicated, the coating was done with a 2:1 ratio of non-  
503 coupled: Cy3-coupled fibronectin prepared with Cy3 Mono-Reactive Dye Pack (GE  
504 Healthcare) as recommended by the manufacturer.

505 Cells were resuspended at  $4 \cdot 10^2$  cells/mm<sup>2</sup> in medium containing 10 µg/mL mitomycin C and  
506 deposited on the patterned slide. After 1 hour of incubation at 37°C, cells were washed 3  
507 times with fresh medium to remove mitomycin C and cells that remained in suspension. The  
508 cells that adhered on micro-patterns were left overnight in the incubator. The day after,  
509 confinement was released by addition of 20 µM BCN-RGD peptide diluted in DMEM media  
510 or, in case of live-imaging experiments, in Fluorobrite DMEM (Thermo Fisher) supplemented  
511 with 10% FBS and 1% Penicillin/Streptomycin. For ROCK inhibition experiments, 50 µM Y-  
512 27632 was added at the same time as BCN-RGD. Samples were then immediately imaged  
513 under a microscope or left in the incubator for 20 more hours and fixed as described above.  
514 When indicated for live-imaging experiments, nuclei were stained before adding BCN-RGD  
515 peptide by incubating the preparations with 5 µg/mL Hoechst 34580 in the medium for 20  
516 minutes at 37°C followed by two washes with fresh media.

517

## 518 **Image acquisition and analysis**

519 For live-microscopy experiments, the samples were placed in a chamber equilibrated at 37°C  
520 under 5% CO<sub>2</sub> atmosphere. Images were acquired with a Yokogawa-Andor CSU-W1

521 Spinning Disk confocal mounted on an inversed motorised Leica DMI8 microscope and  
522 equipped with a sCMOS Orca-Flash 4 V2+ camera (Hamamatsu) and a 63 X oil immersion  
523 objective or a 20 X dry objective, with multi-positioning and a resolution of 0.5-3  $\mu\text{m}$  z-stacks.  
524 Alternatively, the samples were imaged with an Olympus IX81 wide-field fluorescence  
525 microscope equipped with a Coolsnap HQ CCD camera and a 60X oil immersion objective or  
526 a 20 X dry objective. For some experiments, the Nikon Biostation IM-Q microscope was also  
527 used with 10X or 20X objective and multi-positioning.

528 For fixed samples, images were acquired with a Zeiss Apotome fluorescence microscope  
529 equipped with a 63 X oil immersion objective or with a Zeiss LSM 780 confocal microscope  
530 equipped with a 63 X oil immersion objective at a resolution of 0.3  $\mu\text{m}$  z-stacks.

531 Image processing and analysis were done on Fiji software. Analysis of junction parameters  
532 (length, straightness and angle deviation) was done manually with Fiji software based on  
533 phase contrast and GFP-Ecadherin signal. Cell spreading, focal adhesions and  $\alpha$ -catenin  
534 clustering were analyzed by thresholding the image and applying an “Analyze particles”  
535 which gives the number of objects and its area. To calculate the ratio of  $\alpha$ -cat to  $\alpha$ 18-cat  
536 intensities, the mean grey intensity value for the two channels were measured within the  
537 manually-defined junction. Tracking of single cells on fibronectin was done using the Manual  
538 Tracking plugin.

539

#### 540 **Traction force microscopy**

541 Soft silicone elastomer substrates for TFM (Traction force microscopy) were prepared as  
542 described previously with some modifications<sup>95</sup>. Cy 52-276 A and Cy 52-276 B silicone  
543 elastomer components (Dow corning) were mixed in a 5:5 (elastic modulus  $\sim$ 15 kPa for E-  
544 cadherin-coating) or a 5:6 ratio (elastic modulus  $\sim$ 30 kPa for fibronectin-coating). 0.08 g of  
545 elastomer was deposited on 32 mm glass coverslips and allowed to spread progressively.  
546 The substrate was silanized with 10 % (3-aminopropyl triethoxysilane (APTES, Sigma) in

547 100% ethanol for 10 minutes at RT, washed once in 100 % ethanol and dried at 80°C for 10  
548 minutes. The surface was coated for 10 minutes at RT with carboxylated red fluorescent  
549 beads (100 nm, Invitrogen) diluted at 2-3/1000 in deionized water. After washing with  
550 deionized water, the surface was finally functionalized with protein (fibronectin or E-cadherin)  
551 as described above. Seeded cells together with fluorescent beads were imaged either on an  
552 Olympus-CSU-W1 Spinning Disk confocal microscope with a 10 X dry objective and 3  $\mu\text{m}$  z  
553 stacks or on an Olympus-IX81 wide field inverted fluorescence microscope with a 20 X dry  
554 objective for 2 to 24 hours, at a frequency of 1 frame every 10 min, at 37°C under 5% CO<sub>2</sub>  
555 atmosphere. At the end of the acquisition, 100-200  $\mu\text{L}$  of 10% SDS was added in the media  
556 to detach cells and image a reference frame. For force calculation, matPIV was used to  
557 analyse the displacement vectors of the beads, which were further translated into forces  
558 using the FTTC plugin in ImageJ. The vector quiver plots and heat map of magnitude force  
559 was plotted using Matlab. Mean (resp. resultant) forces exerted by cells and doublets were  
560 obtained by computing the average of the magnitude (resp. the vectorial sum) of traction  
561 forces within manually defined masks. For the analysis of tractions forces below cell-cell  
562 junctions, the junction masks and corresponding midline were first manually defined based  
563 on the E-cadherin-GFP pictures. Then, the midline was used to define the average  
564 orientation of the junction, and all force vectors within the junction mask were projected onto  
565 the directions parallel and perpendicular to this orientation. The mask was divided in four  
566 quarters along this mean orientation. The “junction centre parallel (resp. perpendicular) force”  
567 is defined as the averaged absolute value of the parallel (resp. perpendicular) component of  
568 traction forces in the two central quarters of the mask, while the “junction periphery parallel  
569 (resp. perpendicular) force” is the averaged absolute value of the parallel (resp.  
570 perpendicular) component of traction forces in the two outermost quarters.

571  $T_{(\text{parallel} / \text{perpendicular})}^{\text{(center/periphery)}} = \langle |T_{(\text{parallel} / \text{perpendicular})}| \rangle_{\text{(center /$   
572  $\text{periphery})}$

573

## 574 **Calculation of inter-cellular stress**

575 Computing the junctional stress components  $\sigma_{\parallel}$  and  $\sigma_{\perp}$ , respectively parallel and  
576 perpendicular to the cell junction (Fig. 8d), required both the determination of the cell junction  
577 location and the estimation of the inter-cellular stress tensor. The cell junction domain was  
578 defined as the overlap between two masks representing the area covered by each cell in the  
579 doublet. Given the stress tensor, the parallel and perpendicular stress components were  
580 obtained by rotation from the cartesian basis. As exemplified in Fig. 8a, we found in most  
581 cases that the cell junction domain was roughly straight: the mean orientation of the cell  
582 junction domain determined the rotation angle. We checked that following the cell junction  
583 contour did not significantly modify our estimates. Finally, each junctional stress component  
584 was spatially-averaged over the cell junction domain.

585 Intercellular stress was estimated by Bayesian inversion<sup>96</sup>, with a dimensionless  
586 regularization parameter  $\Lambda = 10^5$  (see <sup>8</sup> for details). The spatial domain for stress estimation  
587 was for each image the smallest rectangle encompassing the cell doublet. For simplicity, we  
588 implemented free stress boundary conditions on the straight boundaries of the rectangular  
589 domain, instead of following the cell doublet boundaries. As a consequence, the stress  
590 estimation was qualitative, but sufficed to evaluate differences between conditions. Note that  
591 height variations within the cell doublet were also neglected in the estimation of the 2D inter-  
592 cellular stress field.

593

## 594 **SIM microscopy**

595 Super-resolution structured-illumination microscopy was performed on a Zeiss Elyra PS.1  
596 microscope with a 63 X objective (Plan Apo 1.4NA oil immersion) and an additional optovar  
597 lens 1.6 X. Cells grown on 0.17 mm high-performance Zeiss coverslips were fixed and  
598 prepared for immunostaining, then with DAPI Fluoromount-G mounting media (Southern  
599 Biotech). Laser lines 488 nm, 561 nm and 641 nm were directed into the microscope,

600 passing through a diffraction grating. For 3D SIM imaging, the diffraction grating was rotated  
601 along 3 directions (angles 120°) and translated (five lateral positions) throughout the  
602 acquisition. Typically, 20-30 slices of 110 nm were acquired for each cell corresponding to an  
603 imaging height of 2-3 µm. The fluorescence signal was detected with an EMCCD camera  
604 (iXon-885, Andor, 1004x1002, pixel size 8 µm, QE=65%). Processed SIM images were  
605 aligned via an affine transformation matrix of predefined values obtained using 100 nm  
606 multicolor Tetraspeck fluorescent microspheres (Thermo Fisher Scientific).

607

### 608 **Data display and statistics**

609 Images were mounted using Photoshop and Illustrator. Graphs and statistical tests were  
610 done using GraphPad prism software.

611

### 612 **Acknowledgements**

613 This work was supported by the European Research Council (Grant No. CoG-617233), LABEX  
614 “Who Am I?,” and the Agence Nationale de la Recherche “POLCAM” (Grant No. ANR-17-  
615 CE13-0013). We acknowledge the ImagoSeine core facility of the Institut Jacques Monod,  
616 member of IBISA and France-BioImaging (ANR-10-INBS-04) infrastructures. We thank Orestis  
617 (ImagoSeine core facility, IJM) for technical assistance with SIM experiments. We thank Sree  
618 Vaishnavi and Gianluca Greci (Micro fabrication Core Facility of Mechnabiology Institute,  
619 National University of Singapore) for the fabrication of chrome photomask. We thank A.  
620 Nagafuchi for  $\alpha$ 18-catenin antibody, W.J. Nelson and S. Robine for providing cells, M. Coppey  
621 for RFP-Pericentrin plasmid and M. Piel (IPGG, Curie Institute) for providing original APP and  
622 BCN-RGD compounds. We thank Delphine Delacour and Shreyansh Jain for useful scientific  
623 discussions and critical reading of the manuscript.

624

625

626 **Author contributions**

627 R.M.M, B.L. and M.H.L. conceived the project. R.M.M and B.L. supervised the project. M.L.H,  
628 G.S and T.D performed experiments. M.L.H, G.S., R.M.M and B.L. designed experiments and  
629 analyzed data. J.A., V.C and P.M analyzed traction force microscopy data and calculated inter-  
630 cellular stress. D.W and J.v.H designed and performed the production of APP and BCN-RGD  
631 compounds. M.L.H, G.S., R.M.M, B.L. J.A., V.C and P.M wrote the manuscript.

632

633 **Competing Interests statement**

634 The authors declare no competing interests.

635

636

637 **References**

638

- 639 1. Adams, C. L., Chen, Y. T., Smith, S. J. & Nelson, W. J. Mechanisms of epithelial cell-  
640 cell adhesion and cell compaction revealed by high-resolution tracking of E-cadherin-  
641 green fluorescent protein. *J. Cell Biol.* **142**, 1105–1119 (1998).
- 642 2. Green, K. J., Getsios, S., Troyanovsky, S. & Godsel, L. M. Intercellular junction  
643 assembly, dynamics, and homeostasis. *Cold Spring Harbor perspectives in biology* **2**,  
644 a000125 (2010).
- 645 3. Takeichi, M. Dynamic contacts: rearranging adherens junctions to drive epithelial  
646 remodelling. *Nat. Rev. Mol. Cell Biol.* **15**, 397–410 (2014).
- 647 4. Mège, R. M. & Ishiyama, N. Integration of Cadherin Adhesion and Cytoskeleton at  
648 *Adherens Junctions*. *Cold Spring Harb. Perspect. Biol.* **9**, a028738 (2017).
- 649 5. Cavey, M., Rauzi, M., Lenne, P.-F. & Lecuit, T. A two-tiered mechanism for  
650 stabilization and immobilization of E-cadherin. *Nature* **453**, 751–6 (2008).
- 651 6. Maître, J.-L., Niwayama, R., Turlier, H., Nédélec, F. & Hiiragi, T. Pulsatile cell-  
652 autonomous contractility drives compaction in the mouse embryo. *Nat. Cell Biol.* **17**,  
653 849–855 (2015).



- 654 7. Jacinto, A. *et al.* Dynamic analysis of actin cable function during *Drosophila* dorsal  
655 closure. *Curr. Biol.* **12**, 1245–50 (2002).
- 656 8. Harris, A. R., Daeden, A. & Charras, G. T. Formation of adherens junctions leads to  
657 the emergence of a tissue-level tension in epithelial monolayers. *J. Cell Sci.* **127**,  
658 2507–17 (2014).
- 659 9. Kocgozlu, L. *et al.* Epithelial Cell Packing Induces Distinct Modes of Cell Extrusions.  
660 *Curr. Biol.* **26**, 2942–2950 (2016).
- 661 10. Wood, W. *et al.* Wound healing recapitulates morphogenesis in *Drosophila* embryos.  
662 *Nat. Cell Biol.* **4**, 907–912 (2002).
- 663 11. Yap, A. S., Briehner, W. M., Pruschy, M. & Gumbiner, B. M. Lateral clustering of the  
664 adhesive ectodomain: A fundamental determinant of cadherin function. *Curr. Biol.* **7**,  
665 308–315 (1997).
- 666 12. Strale, P. O. *et al.* The formation of ordered nanoclusters controls cadherin anchoring  
667 to actin and cell-cell contact fluidity. *J. Cell Biol.* **210**, 333–346 (2015).
- 668 13. Adams, C. L., Chen, Y. T., Smith, S. J. & Nelson, W. J. Mechanisms of epithelial cell-  
669 cell adhesion and cell compaction revealed by high-resolution tracking of E-cadherin-  
670 green fluorescent protein. *J. Cell Biol.* **142**, 1105–19 (1998).
- 671 14. Mège, R. M., Gavard, J. & Lambert, M. Regulation of cell-cell junctions by the  
672 cytoskeleton. *Current Opinion in Cell Biology* **18**, 541–548 (2006).
- 673 15. Grikscheit, K., Frank, T., Wang, Y. & Grosse, R. Junctional actin assembly is mediated  
674 by Formin-like 2 downstream of Rac1. *J. Cell Biol.* **209**, 367–376 (2015).
- 675 16. Kovacs, E. M., Goodwin, M., Ali, R. G., Paterson, A. D. & Yap, A. S. Cadherin-directed  
676 actin assembly: E-cadherin physically associates with the Arp2/3 complex to direct  
677 actin assembly in nascent adhesive contacts. *Curr. Biol.* **12**, 379–382 (2002).
- 678 17. Yamada, S. & Nelson, W. J. Localized zones of Rho and Rac activities drive initiation  
679 and expansion of epithelial cell-cell adhesion. *J. Cell Biol.* **178**, 517–527 (2007).
- 680 18. Krendel, M. F. & Bonder, E. M. Analysis of actin filament bundle dynamics during  
681 contact formation in live epithelial cells. *Cell Motil. Cytoskeleton* **43**, 296–309 (1999).

- 682 19. Chu, Y. S. *et al.* Force measurements in E-cadherin-mediated cell doublets reveal  
683 rapid adhesion strengthened by actin cytoskeleton remodeling through Rac and  
684 Cdc42. *J. Cell Biol.* **167**, 1183–1194 (2004).
- 685 20. Borghi, N. *et al.* E-cadherin is under constitutive actomyosin-generated tension that is  
686 increased at cell-cell contacts upon externally applied stretch. *Proc. Natl. Acad. Sci.*  
687 **109**, 12568–12573 (2012).
- 688 21. Curran, S. *et al.* Myosin II Controls Junction Fluctuations to Guide Epithelial Tissue  
689 Ordering. *Dev. Cell* (2017). doi:10.1016/j.devcel.2017.09.018
- 690 22. Ladoux, B. & Mège, R.-M. Mechanobiology of collective cell behaviours. *Nat. Rev.*  
691 *Mol. Cell Biol.* nrm.2017.98 (2017). doi:10.1038/nrm.2017.98
- 692 23. Salomon, J. *et al.* Contractile forces at tricellular contacts modulate epithelial  
693 organization and monolayer integrity. *Nat. Commun.* **8**, 13998 (2017).
- 694 24. Munjal, A. & Lecuit, T. Actomyosin networks and tissue morphogenesis. *Development*  
695 **141**, 1789–1793 (2014).
- 696 25. Tamada, M., Perez, T. D., Nelson, W. J. & Sheetz, M. P. Two distinct modes of  
697 myosin assembly and dynamics during epithelial wound closure. *J. Cell Biol.* **176**, 27–  
698 33 (2007).
- 699 26. Begnaud, S., Chen, T., Delacour, D., Mège, R. M. & Ladoux, B. Mechanics of  
700 epithelial tissues during gap closure. *Current Opinion in Cell Biology* **42**, 52–62 (2016).
- 701 27. Rosenblatt, J., Raff, M. C. & Cramer, L. P. An epithelial cell destined for apoptosis  
702 signals its neighbors to extrude it by an actin- and myosin-dependent mechanism.  
703 *Curr. Biol.* **11**, 1847–1857 (2001).
- 704 28. Weng, M. & Wieschaus, E. Myosin-dependent remodeling of adherens junctions  
705 protects junctions from Snail-dependent disassembly. *J. Cell Biol.* **212**, 219–29 (2016).
- 706 29. Liu, Z. *et al.* Mechanical tugging force regulates the size of cell-cell junctions. *Proc.*  
707 *Natl. Acad. Sci.* **107**, 9944–9949 (2010).
- 708 30. Hoelzle, M. K. & Svitkina, T. The cytoskeletal mechanisms of cell-cell junction  
709 formation in endothelial cells. *Mol. Biol. Cell* **23**, 310–323 (2012).

- 710 31. Shewan, A. M. *et al.* Myosin 2 is a key Rho kinase target necessary for the local  
711 concentration of E-cadherin at cell-cell contacts. *Mol. Biol. Cell* **16**, 4531–42 (2005).
- 712 32. Smutny, M. *et al.* Myosin II isoforms identify distinct functional modules that support  
713 integrity of the epithelial zonula adherens. *Nat. Cell Biol.* **12**, 696–702 (2010).
- 714 33. Vicente-Manzanares, M., Ma, X., Adelstein, R. S. & Horwitz, A. R. Non-muscle myosin  
715 II takes centre stage in cell adhesion and migration. *Nat. Rev. Mol. Cell Biol.* **10**, 778–  
716 790 (2009).
- 717 34. Conti, M. A. & Adelstein, R. S. Nonmuscle myosin II moves in new directions. *J. Cell*  
718 *Sci.* **121**, 11–8 (2008).
- 719 35. Ma, X. *et al.* Ablation of Nonmuscle Myosin II-B and II-C Reveals a Role for  
720 Nonmuscle Myosin II in Cardiac Myocyte Karyokinesis. *Mol. Biol. Cell* **21**, 3952–3962  
721 (2010).
- 722 36. Beach, J. R. & Hammer, J. A. Myosin II isoform co-assembly and differential regulation  
723 in mammalian systems. *Experimental Cell Research* **334**, 2–9 (2015).
- 724 37. Wang, F. *et al.* Kinetic mechanism of non-muscle myosin IIB. Functional adaptations  
725 for tension generation and maintenance. *J. Biol. Chem.* **278**, 27439–27448 (2003).
- 726 38. Kovács, M., Wang, F., Hu, A., Zhang, Y. & Sellers, J. R. Functional divergence of  
727 human cytoplasmic myosin II. Kinetic characterization of the non-muscle IIA isoform.  
728 *J. Biol. Chem.* **278**, 38132–38140 (2003).
- 729 39. Kovács, M., Thirumurugan, K., Knight, P. J. & Sellers, J. R. Load-dependent  
730 mechanism of nonmuscle myosin 2. *Proc. Natl. Acad. Sci. U. S. A.* **104**, 9994–9  
731 (2007).
- 732 40. Billington, N., Wang, A., Mao, J., Adelstein, R. S. & Sellers, J. R. Characterization of  
733 three full-length human nonmuscle myosin II paralogs. *J. Biol. Chem.* **288**, 33398–  
734 33410 (2013).
- 735 41. Sandquist, J. C. & Means, A. R. The C-Terminal Tail Region of Nonmuscle Myosin II  
736 Directs Isoform-specific Distribution in Migrating Cells. *Mol. Biol. Cell* **19**, 5156–5167  
737 (2008).

- 738 42. Juanes-Garcia, A. *et al.* A regulatory motif in nonmuscle myosin II-B regulates its role  
739 in migratory front-back polarity. *J. Cell Biol.* **209**, 23–32 (2015).
- 740 43. Chang, C.-W. & Kumar, S. Differential Contributions of Nonmuscle Myosin II Isoforms  
741 and Functional Domains to Stress Fiber Mechanics. *Sci. Rep.* **5**, 13736 (2015).
- 742 44. Shutova, M. S., Spessott, W. A., Giraudo, C. G. & Svitkina, T. Endogenous species of  
743 mammalian nonmuscle myosin IIA and IIB include activated monomers and  
744 heteropolymers. *Curr. Biol.* **24**, 1958–1968 (2014).
- 745 45. Beach, J. R. *et al.* Nonmuscle myosin II isoforms coassemble in living cells. *Curr. Biol.*  
746 **24**, 1160–1166 (2014).
- 747 46. Skoglund, P., Rolo, A., Chen, X., Gumbiner, B. M. & Keller, R. Convergence and  
748 extension at gastrulation require a myosin IIB-dependent cortical actin network.  
749 *Development* **135**, 2435–2444 (2008).
- 750 47. Wang, A., Ma, X., Conti, M. A. & Adelstein, R. S. Distinct and redundant roles of the  
751 non-muscle myosin II isoforms and functional domains. *Biochem. Soc. Trans.* **39**,  
752 1131–5 (2011).
- 753 48. Haque, F. *et al.* Non-muscle myosin II deletion in the developing kidney causes ureter-  
754 bladder misconnection and apical extrusion of the nephric duct lineage epithelia. *Dev.*  
755 *Biol.* **427**, 121–130 (2017).
- 756 49. Ridge, L. A. *et al.* Non-muscle myosin IIB (Myh10) is required for epicardial function  
757 and coronary vessel formation during mammalian development. *PLOS Genet.* **13**,  
758 e1007068 (2017).
- 759 50. Conti, M. A., Even-Ram, S., Liu, C., Yamada, K. M. & Adelstein, R. S. Defects in cell  
760 adhesion and the visceral endoderm following ablation of nonmuscle myosin heavy  
761 chain II-A in mice. *J. Biol. Chem.* **279**, 41263–41266 (2004).
- 762 51. Tullio, A. N. *et al.* Nonmuscle myosin II-B is required for normal development of the  
763 mouse heart. *Proc. Natl. Acad. Sci.* **94**, 12407–12412 (1997).
- 764 52. Doyle, A. D. *et al.* Micro-environmental control of cell migration--myosin IIA is required  
765 for efficient migration in fibrillar environments through control of cell adhesion

- 766 dynamics. *J. Cell Sci.* **125**, 2244–56 (2012).
- 767 53. Betapudi, V., Licate, L. S. & Egelhoff, T. T. Distinct roles of nonmuscle myosin II  
768 isoforms in the regulation of MDA-MB-231 breast cancer cell spreading and migration.  
769 *Cancer Res.* **66**, 4725–4733 (2006).
- 770 54. Cai, Y. *et al.* Nonmuscle Myosin IIA-Dependent Force Inhibits Cell Spreading and  
771 Drives F-Actin Flow. *Biophys. J.* **91**, 3907–3920 (2006).
- 772 55. Jorrich, M. H., Shih, W. & Yamada, S. Myosin IIA deficient cells migrate efficiently  
773 despite reduced traction forces at cell periphery. *Biol. Open* **2**, 368–372 (2013).
- 774 56. Kolega, J. Asymmetric distribution of myosin IIB in migrating endothelial cells is  
775 regulated by a rho-dependent kinase and contributes to tail retraction. *Mol Biol Cell* **14**,  
776 4745–4757 (2003).
- 777 57. Sandquist, J. C., Swenson, K. I., DeMali, K. A., Burridge, K. & Means, A. R. Rho  
778 kinase differentially regulates phosphorylation of nonmuscle myosin II isoforms A and  
779 B during cell rounding and migration. *J. Biol. Chem.* **281**, 35873–35883 (2006).
- 780 58. Vicente-Manzanares, M., Koach, M. A., Whitmore, L., Lamers, M. L. & Horwitz, A. F.  
781 Segregation and activation of myosin IIB creates a rear in migrating cells. *J. Cell Biol.*  
782 **183**, 543–554 (2008).
- 783 59. Vicente-Manzanares, M., Newell-Litwa, K., Bachir, A. I., Whitmore, L. A. & Horwitz, A.  
784 R. Myosin IIA/IIB restrict adhesive and protrusive signaling to generate front-back  
785 polarity in migrating cells. *J. Cell Biol.* **193**, 381–396 (2011).
- 786 60. Betapudi, V. Myosin II motor proteins with different functions determine the fate of  
787 lamellipodia extension during cell spreading. *PLoS One* **5**, e8560 (2010).
- 788 61. Shutova, M. S. *et al.* Self-sorting of nonmuscle myosins IIA and IIB polarizes the  
789 cytoskeleton and modulates cell motility. *J. Cell Biol.* **216**, 2877–2889 (2017).
- 790 62. Shih, W. & Yamada, S. Myosin IIA dependent retrograde flow drives 3D cell migration.  
791 *Biophys. J.* **98**, L29–L31 (2010).
- 792 63. Thomas, D. G. *et al.* Non-muscle myosin IIB is critical for nuclear translocation during  
793 3D invasion. *J. Cell Biol.* **210**, 583–594 (2015).

- 794 64. Raab, M. *et al.* Crawling from soft to stiff matrix polarizes the cytoskeleton and  
795 phosphoregulates myosin-II heavy chain. *J. Cell Biol.* **199**, 669–683 (2012).
- 796 65. Efimova, N. & Svitkina, T. M. Branched actin networks push against each other at  
797 adherens junctions to maintain cell-cell adhesion. *J. Cell Biol.* jcb.201708103 (2018).  
798 doi:10.1083/jcb.201708103
- 799 66. Van Dongen, S. F. M., Maiuri, P., Marie, E., Tribet, C. & Piel, M. Triggering cell  
800 adhesion, migration or shape change with a dynamic surface coating. *Adv. Mater.* **25**,  
801 1687–1691 (2013).
- 802 67. Desai, R. A., Gao, L., Raghavan, S., Liu, W. F. & Chen, C. S. Cell polarity triggered by  
803 cell-cell adhesion via E-cadherin. *J. Cell Sci.* **122**, 905–11 (2009).
- 804 68. Dupin, I., Camand, E. & Etienne-Manneville, S. Classical cadherins control nucleus  
805 and centrosome position and cell polarity. *J. Cell Biol.* **185**, 779–86 (2009).
- 806 69. Rodríguez-Fraticelli, A. E., Auzan, M., Alonso, M. A., Bornens, M. & Martín-Belmonte,  
807 F. Cell confinement controls centrosome positioning and lumen initiation during  
808 epithelial morphogenesis. *J. Cell Biol.* **198**, 1011–23 (2012).
- 809 70. Burute, M. *et al.* Polarity Reversal by Centrosome Repositioning Primes Cell  
810 Scattering during Epithelial-to-Mesenchymal Transition. *Dev. Cell* **40**, 168–184 (2017).
- 811 71. Stramer, B. & Mayor, R. Mechanisms and in vivo functions of contact inhibition of  
812 locomotion. *Nat. Rev. Mol. Cell Biol.* **18**, 43–55 (2017).
- 813 72. Menko, A. S. *et al.* A central role for vimentin in regulating repair function during  
814 healing of the lens epithelium. *Mol. Biol. Cell* **25**, 776–90 (2014).
- 815 73. Vassilev, V., Platek, A., Hiver, S., Enomoto, H. & Takeichi, M. Catenins Steer Cell  
816 Migration via Stabilization of Front-Rear Polarity. *Dev. Cell* (2017).  
817 doi:10.1016/j.devcel.2017.10.014
- 818 74. Benjamin, J. M. *et al.* AlphaE-catenin regulates actin dynamics independently of  
819 cadherin-mediated cell-cell adhesion. *J. Cell Biol.* **189**, 339–352 (2010).
- 820 75. Choi, W. *et al.* Remodeling the zonula adherens in response to tension and the role of  
821 afadin in this response. *J. Cell Biol.* **213**, 243–60 (2016).

- 822 76. Ebrahim, S. *et al.* NMII forms a contractile transcellular sarcomeric network to regulate  
823 apical cell junctions and tissue geometry. *Curr. Biol.* **23**, 731–6 (2013).
- 824 77. Verma, S. *et al.* A WAVE2-Arp2/3 actin nucleator apparatus supports junctional  
825 tension at the epithelial zonula adherens. *Mol. Biol. Cell* **23**, 4601–4610 (2012).
- 826 78. Ishiyama, N. *et al.* Force-dependent allostery of the  $\alpha$ -catenin actin-binding domain  
827 controls adherens junction dynamics and functions. *Nat. Commun.* **9**, 5121 (2018).
- 828 79. Yonemura, S., Wada, Y., Watanabe, T., Nagafuchi, A. & Shibata, M.  $\alpha$ -Catenin as a  
829 tension transducer that induces adherens junction development. *Nat. Cell Biol.* **12**,  
830 533–542 (2010).
- 831 80. Maruthamuthu, V., Sabass, B., Schwarz, U. S. & Gardel, M. L. Cell-ECM traction force  
832 modulates endogenous tension at cell-cell contacts. *Proc. Natl. Acad. Sci.* **108**, 4708–  
833 4713 (2011).
- 834 81. Ng, M. R. osa, Besser, A., Brugge, J. S. & Danuser, G. Mapping the dynamics of force  
835 transduction at cell-cell junctions of epithelial clusters. *Elife* **3**, e03282 (2014).
- 836 82. Ladoux, B., Nelson, W. J., Yan, J. & Mège, R. M. The mechanotransduction  
837 machinery at work at adherens junctions. *Integr. Biol.* **7**, 1109–1119 (2015).
- 838 83. Collins, C., Denisin, A. K., Pruitt, B. L. & Nelson, W. J. Changes in E-cadherin rigidity  
839 sensing regulate cell adhesion. *Proc. Natl. Acad. Sci.* **114**, E5835–E5844 (2017).
- 840 84. Gavard, J. *et al.* Journal of Cell Science. *J. Cell Sci.* **113**, 2865–2875 (2004).
- 841 85. Nier, V. *et al.* Inference of Internal Stress in a Cell Monolayer. *Biophys. J.* **110**, 1625–  
842 1635 (2016).
- 843 86. Saw, T. B. *et al.* Topological defects in epithelia govern cell death and extrusion.  
844 *Nature* **544**, 212–216 (2017).
- 845 87. Ma, X., Bao, J. & Adelstein, R. S. Loss of Cell Adhesion Causes Hydrocephalus in  
846 Nonmuscle Myosin II-B-ablated and Mutated Mice. *Mol. Biol. Cell* **18**, 2305–2312  
847 (2007).
- 848 88. Ma, X. *et al.* Nonmuscle myosin II exerts tension but does not translocate actin in  
849 vertebrate cytokinesis. *Proc. Natl. Acad. Sci. U. S. A.* **109**, 4509–14 (2012).

- 850 89. Yonemura, S., Wada, Y., Watanabe, T., Nagafuchi, A. & Shibata, M.  $\alpha$ -Catenin as a  
851 tension transducer that induces adherens junction development. *Nat. Cell Biol.* 12,  
852 533–542 (2010).
- 853 90. Van Dongen, S. F. M., Maiuri, P., Marie, E., Tribet, C. & Piel, M. Triggering cell  
854 adhesion, migration or shape change with a dynamic surface coating. *Adv. Mater.* 25,  
855 1687–1691 (2013).
- 856 91. Adams, C. L., Chen, Y. T., Smith, S. J. & Nelson, W. J. Mechanisms of epithelial cell-  
857 cell adhesion and cell compaction revealed by high-resolution tracking of E-cadherin-  
858 green fluorescent protein. *J. Cell Biol.* 142, 1105–19 (1998).
- 859 92. Benjamin, J. M. et al. AlphaE-catenin regulates actin dynamics independently of  
860 cadherin-mediated cell-cell adhesion. *J. Cell Biol.* 189, 339–352 (2010).
- 861 93. Lee, E. et al. Deletion of the cytoplasmic domain of N-cadherin reduces, but does not  
862 eliminate, traction force-transmission. *Biochem. Biophys. Res. Commun.* 478, 1640–  
863 1646 (2016).
- 864 94. van Dongen, S. F. M., Maiuri, P. & Piel, M. A reagent-based dynamic trigger for cell  
865 adhesion, shape change, or cocultures. *Methods Cell Biol.* 120, 171–84 (2014).
- 866 95. Vedula, S. R. K. et al. Epithelial bridges maintain tissue integrity during collective cell  
867 migration. *Nat. Mater.* 13, 87–96 (2014).
- 868 96. Nier, V. et al. Inference of Internal Stress in a Cell Monolayer. *Biophys. J.* 110, 1625–  
869 1635 (2016).
- 870
- 871
- 872
- 873
- 874
- 875
- 876
- 877



## Figure 1

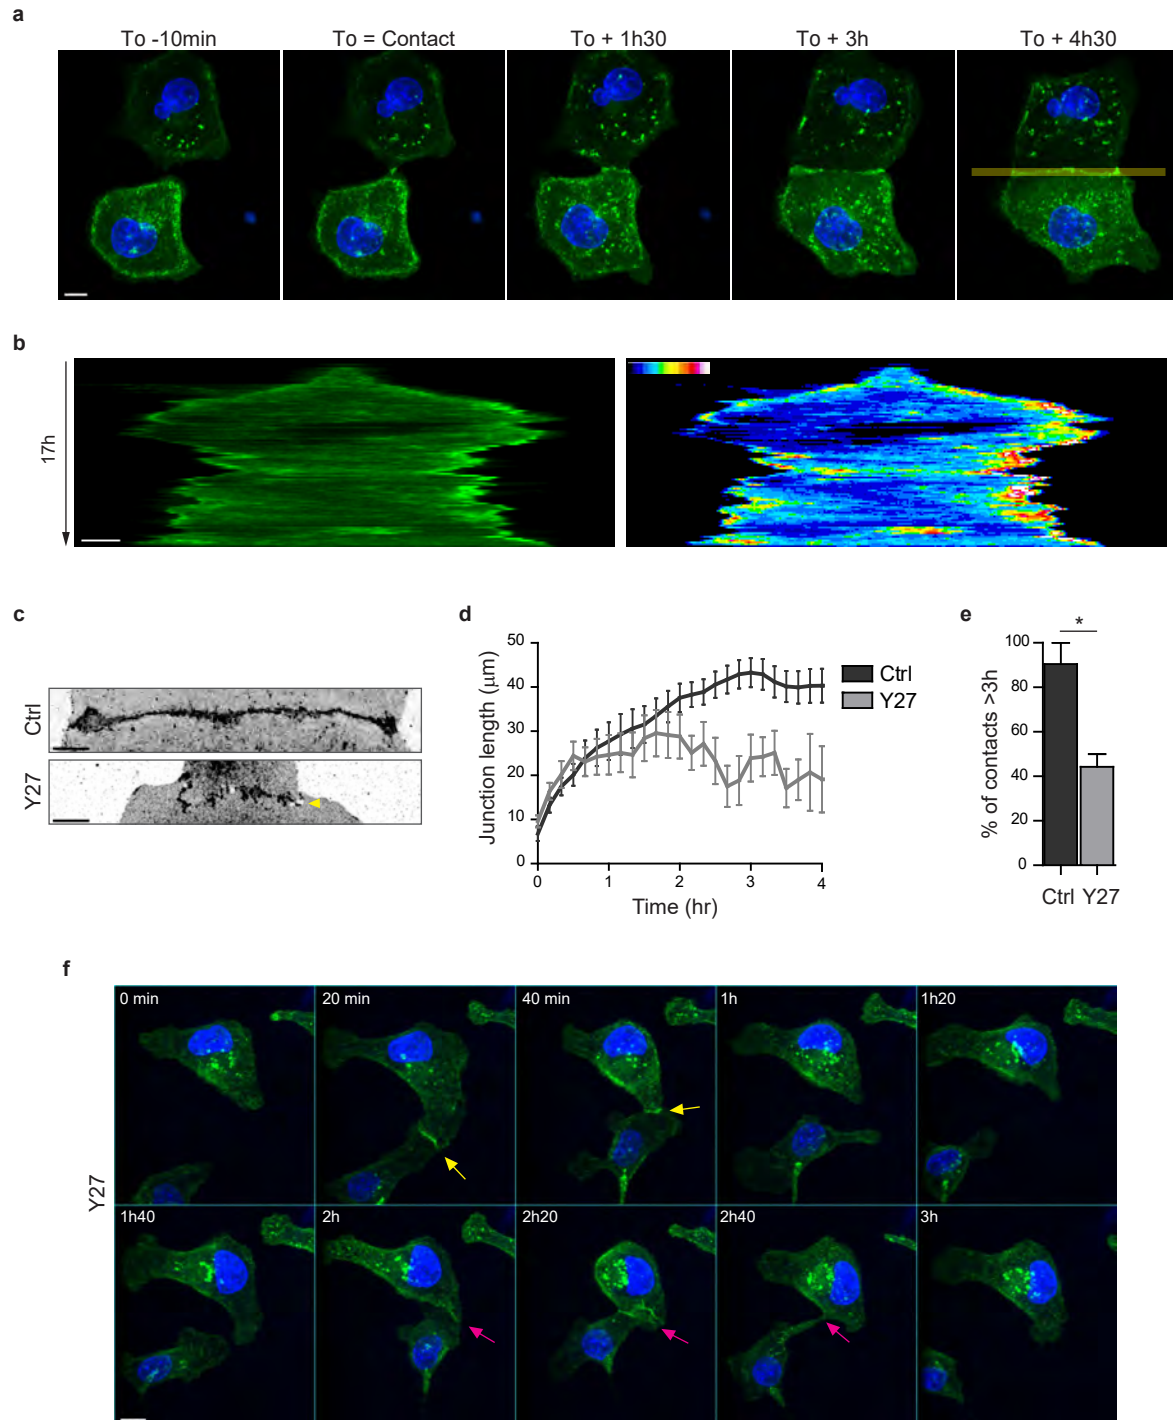

## Figure 2

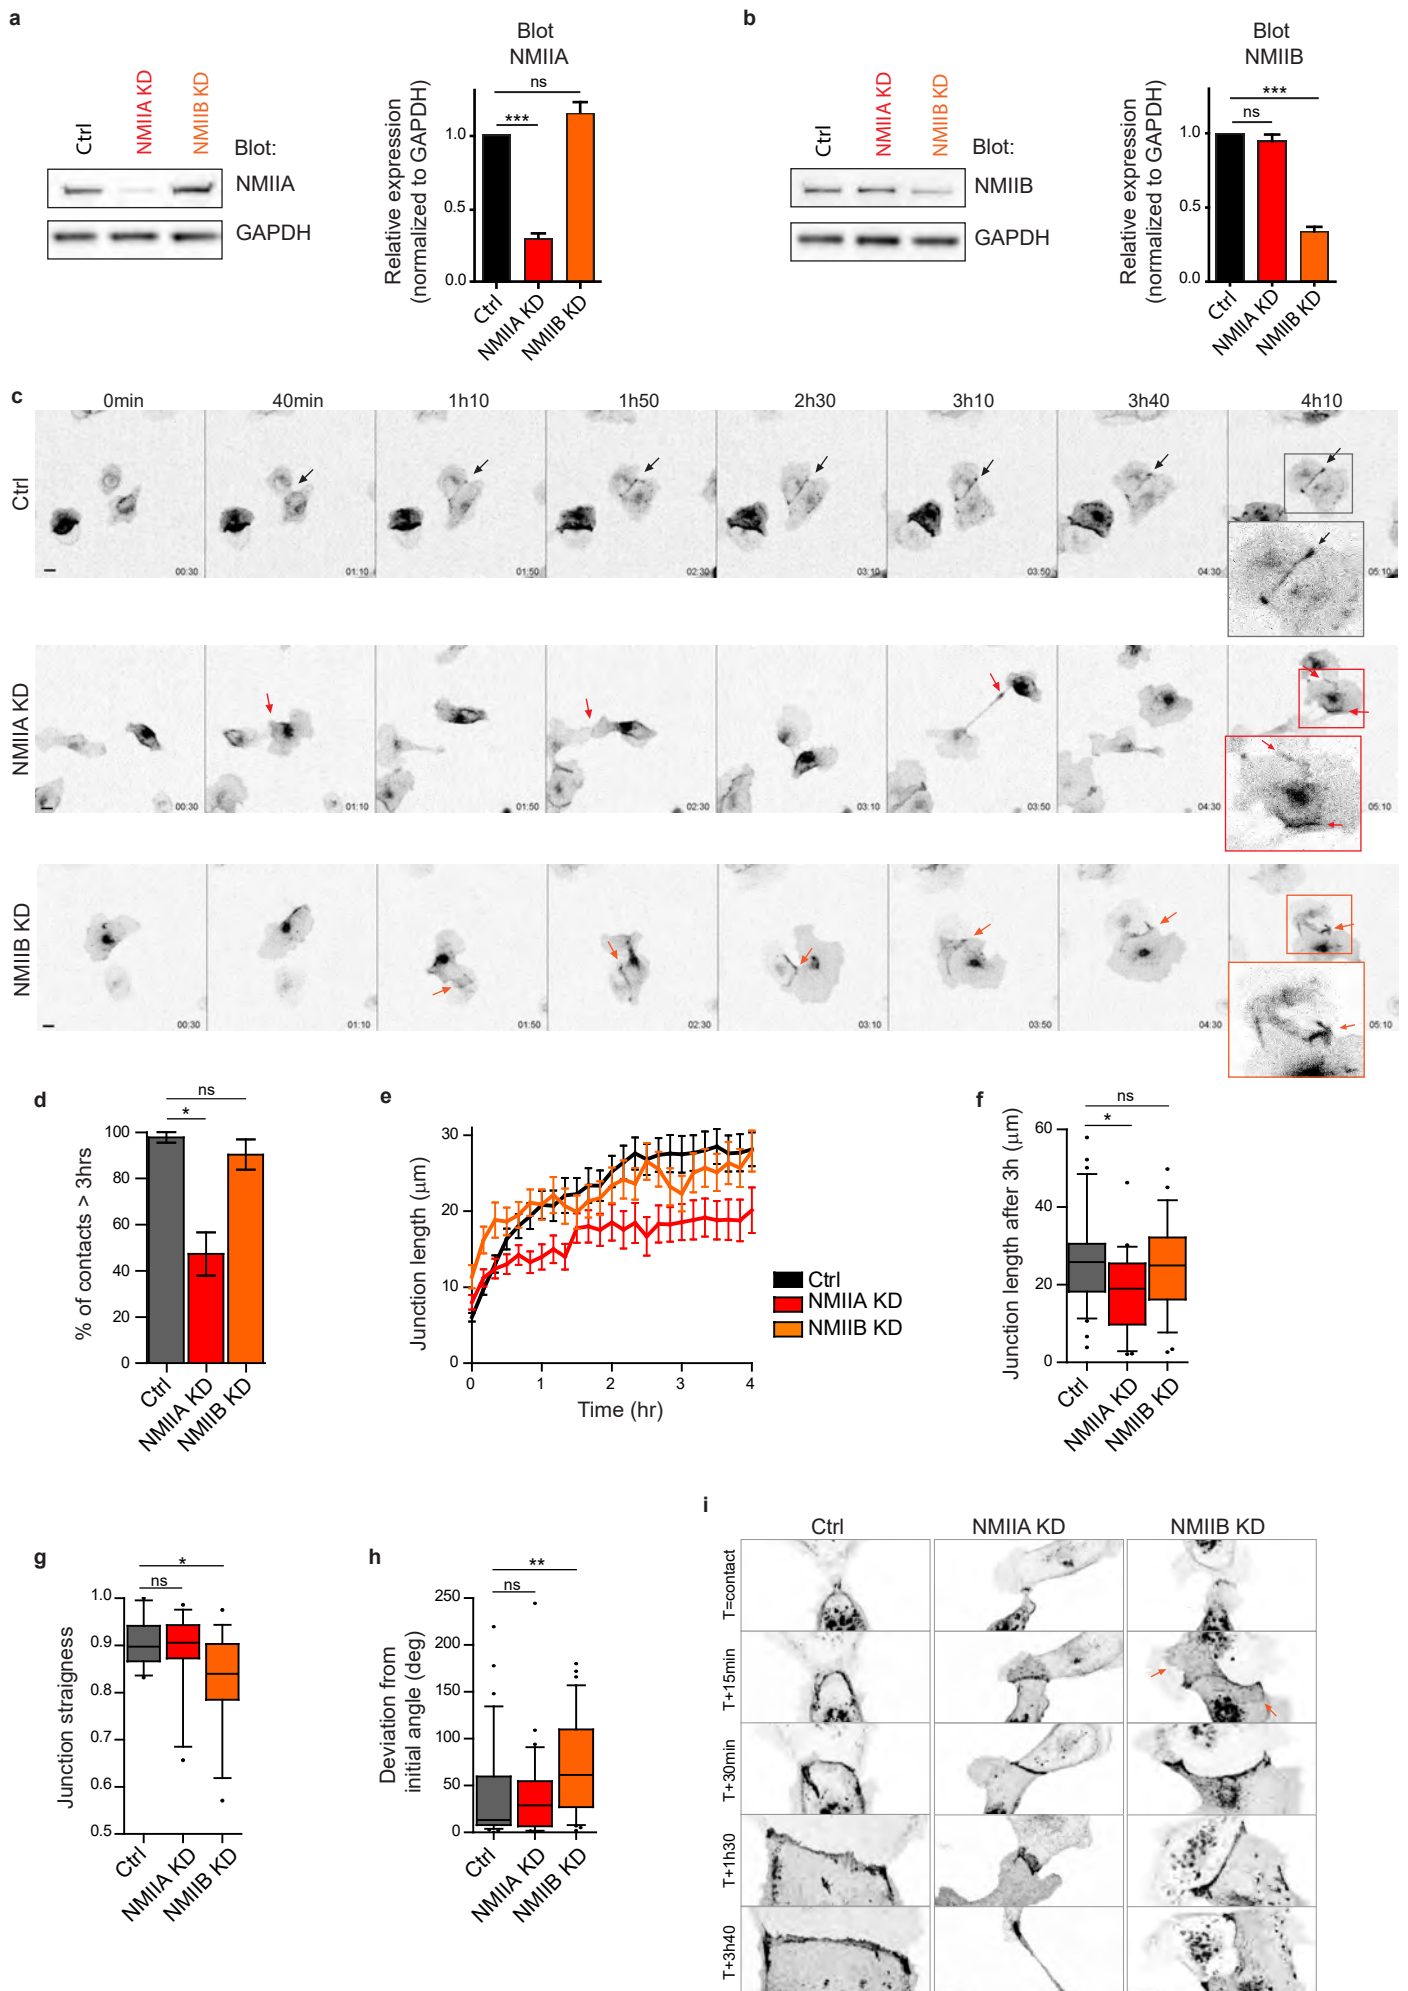

### Figure 3

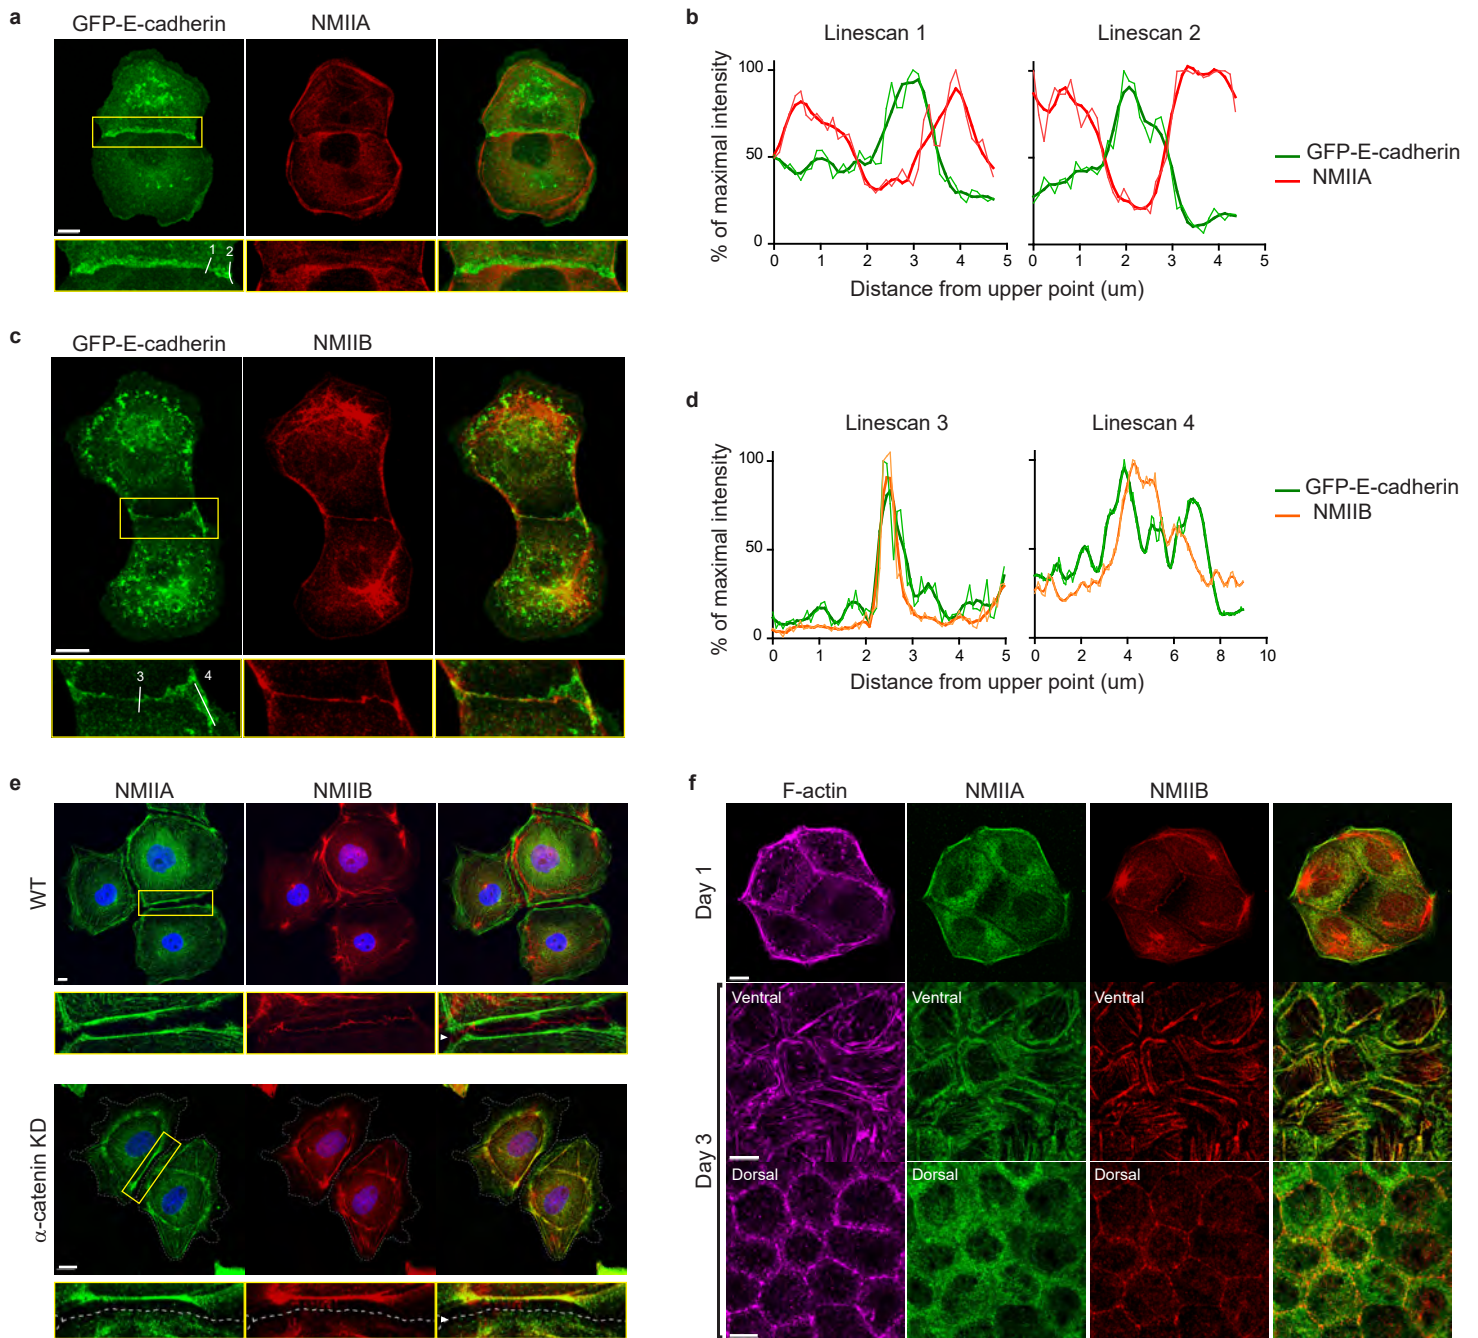

## Figure 4

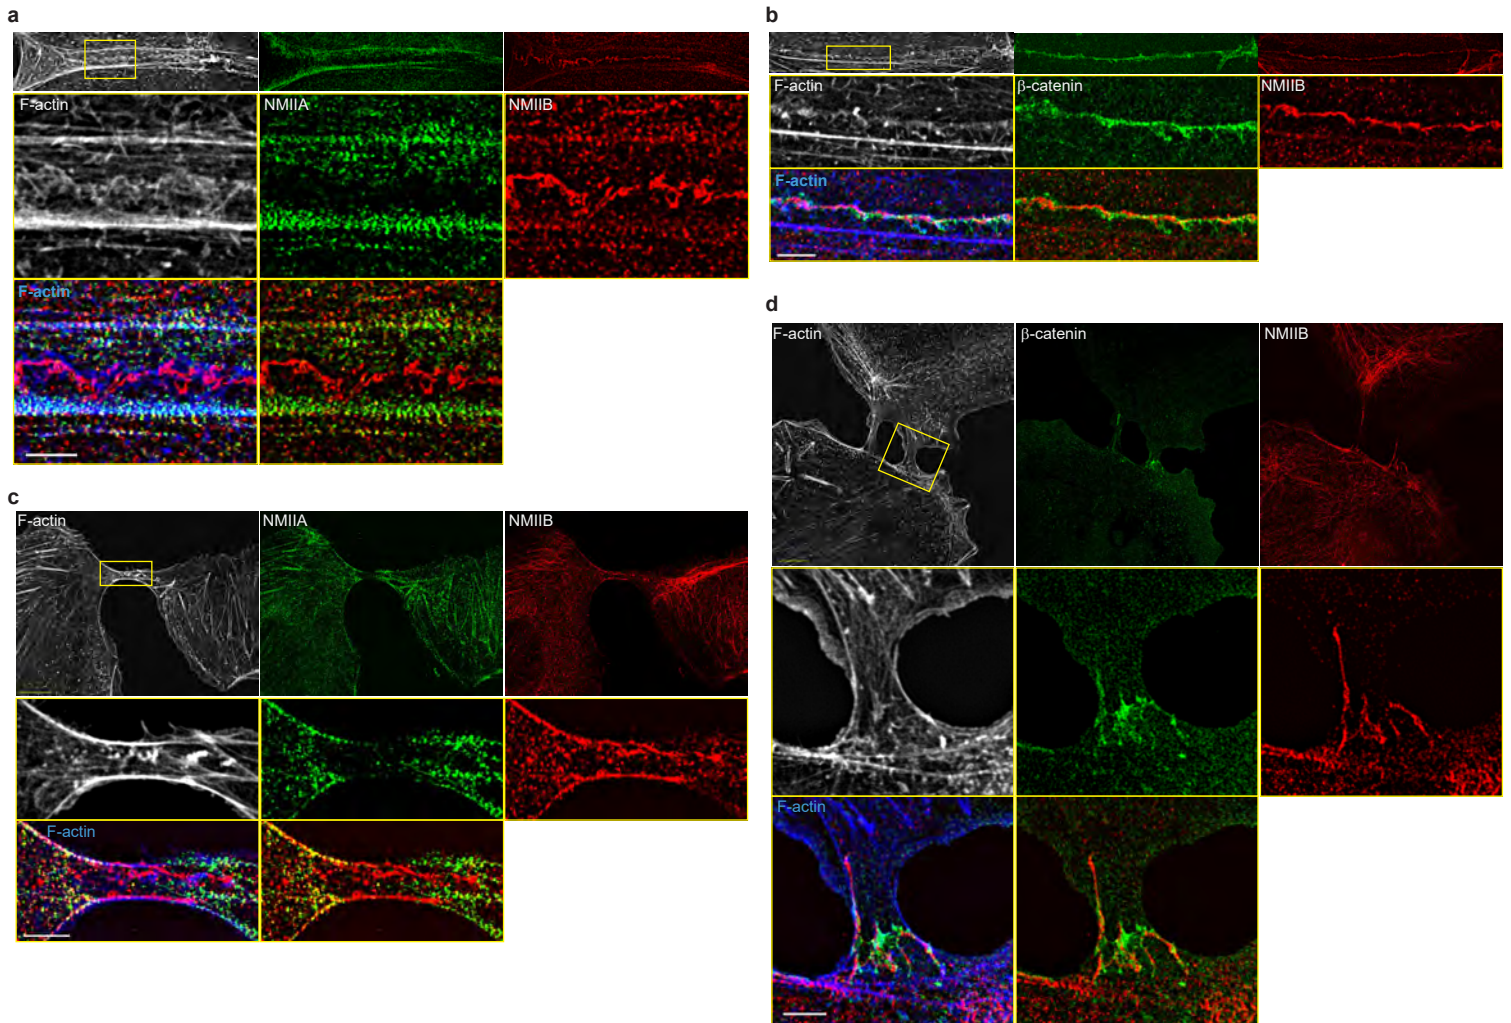

## Figure 5

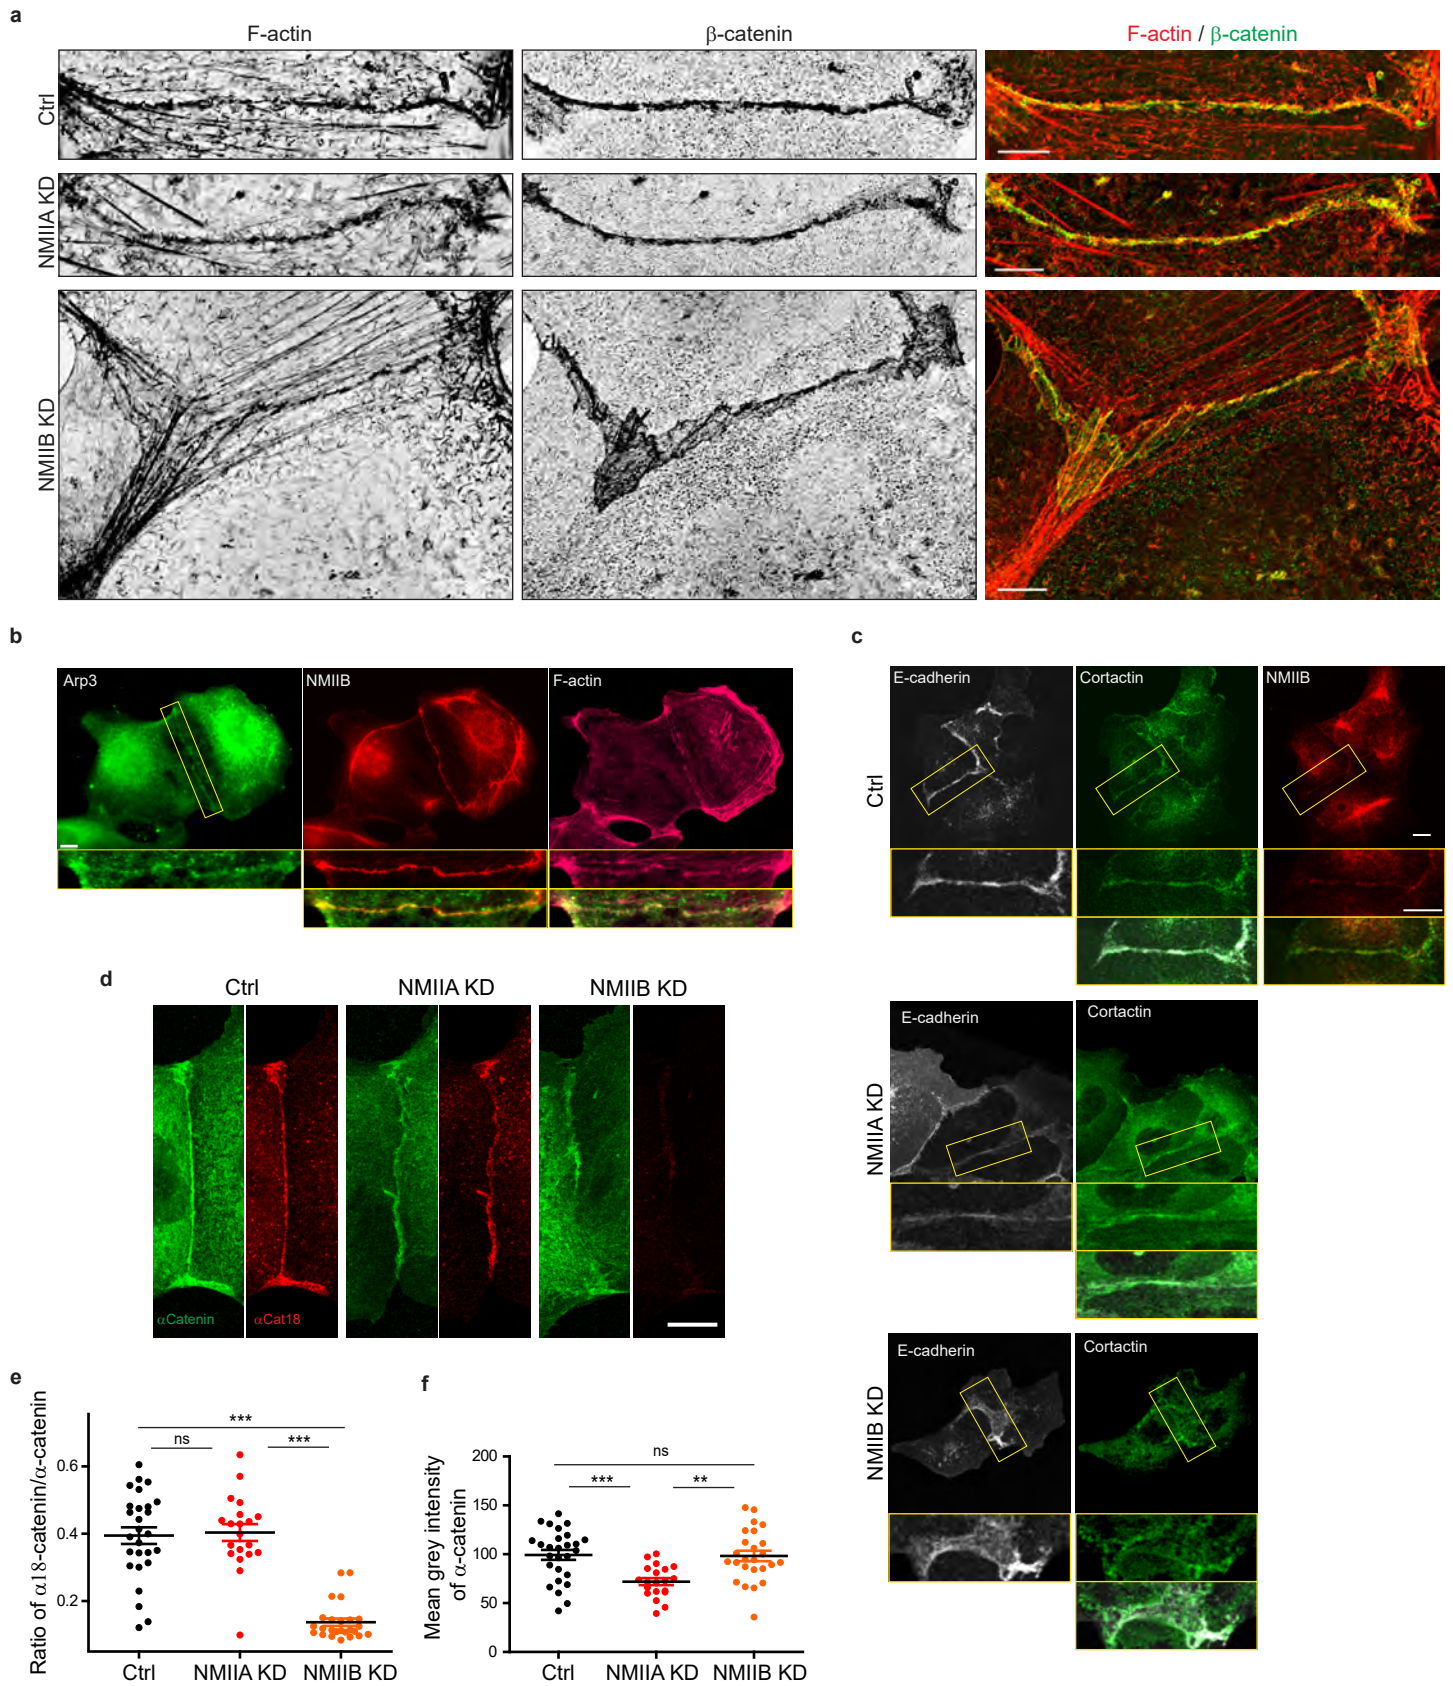

## Figure 6

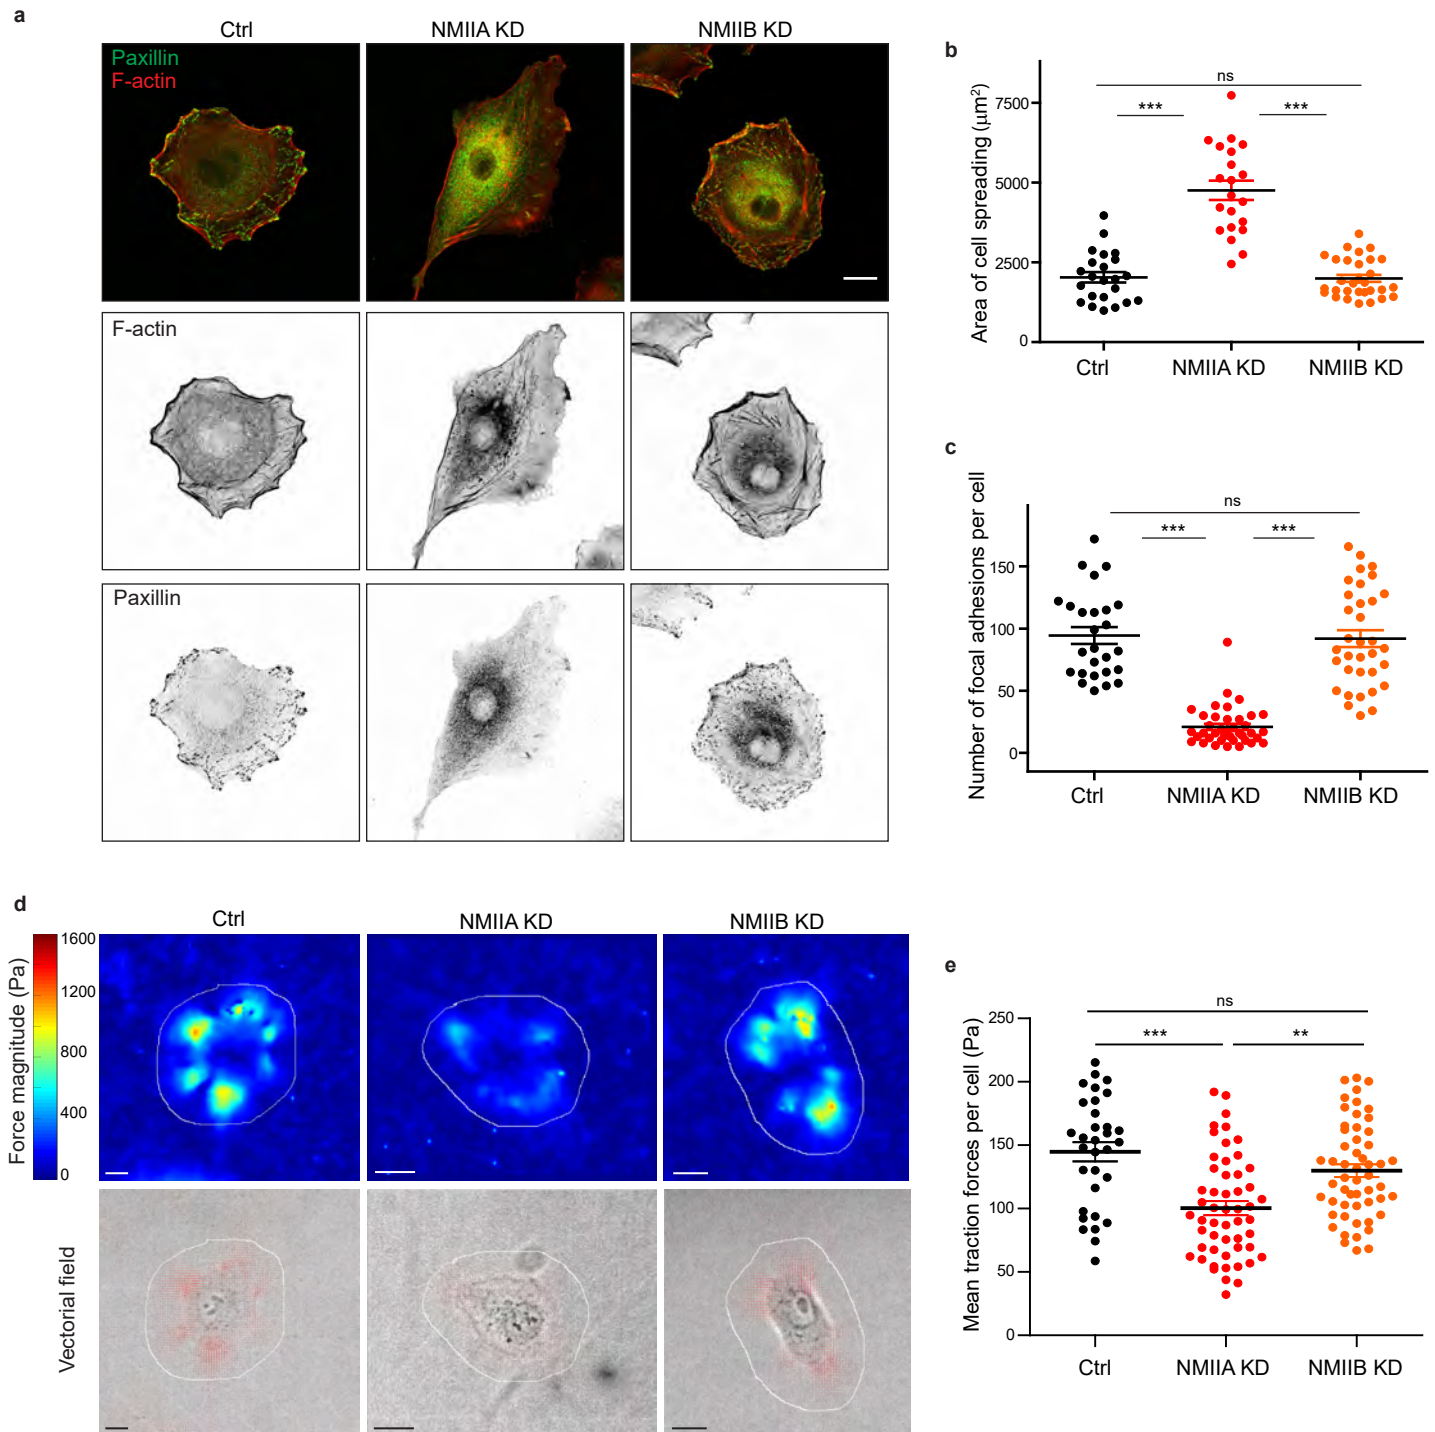

Figure 7

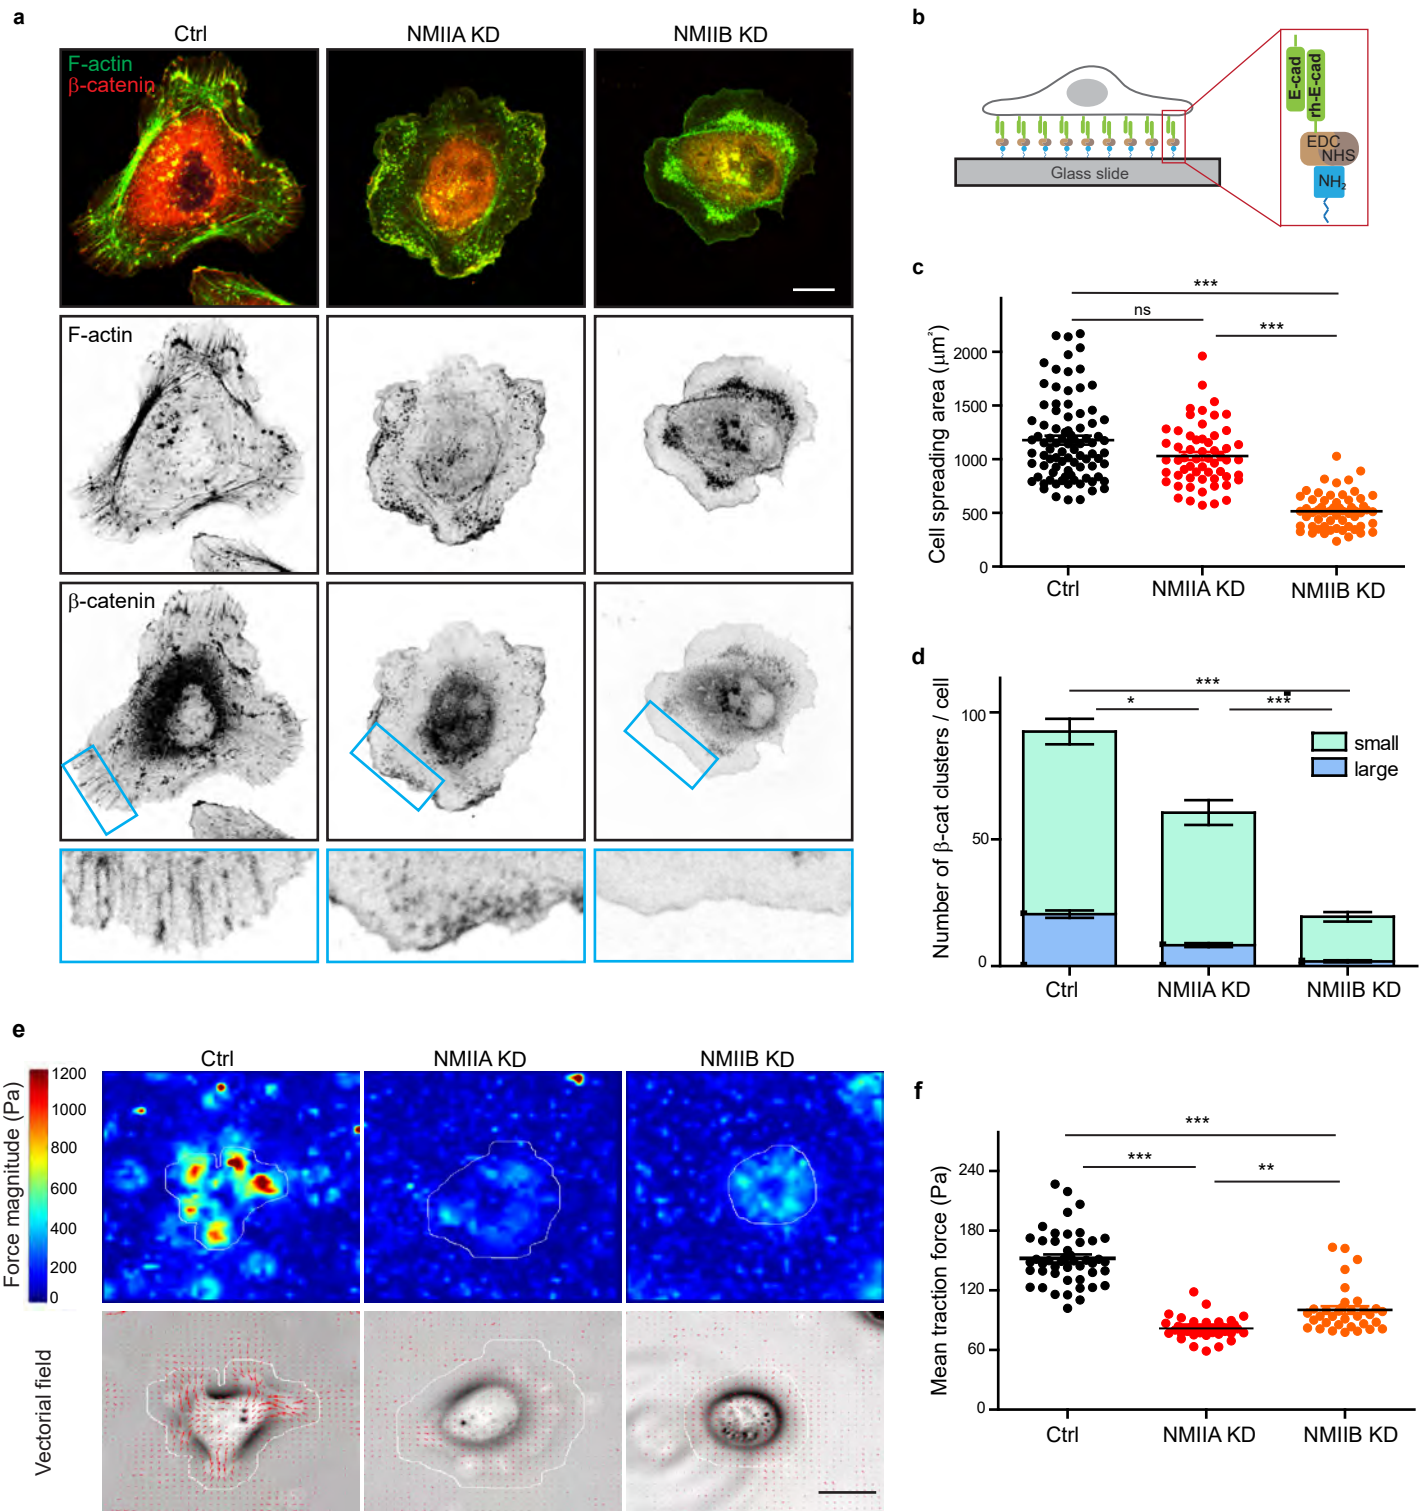

## Figure 8

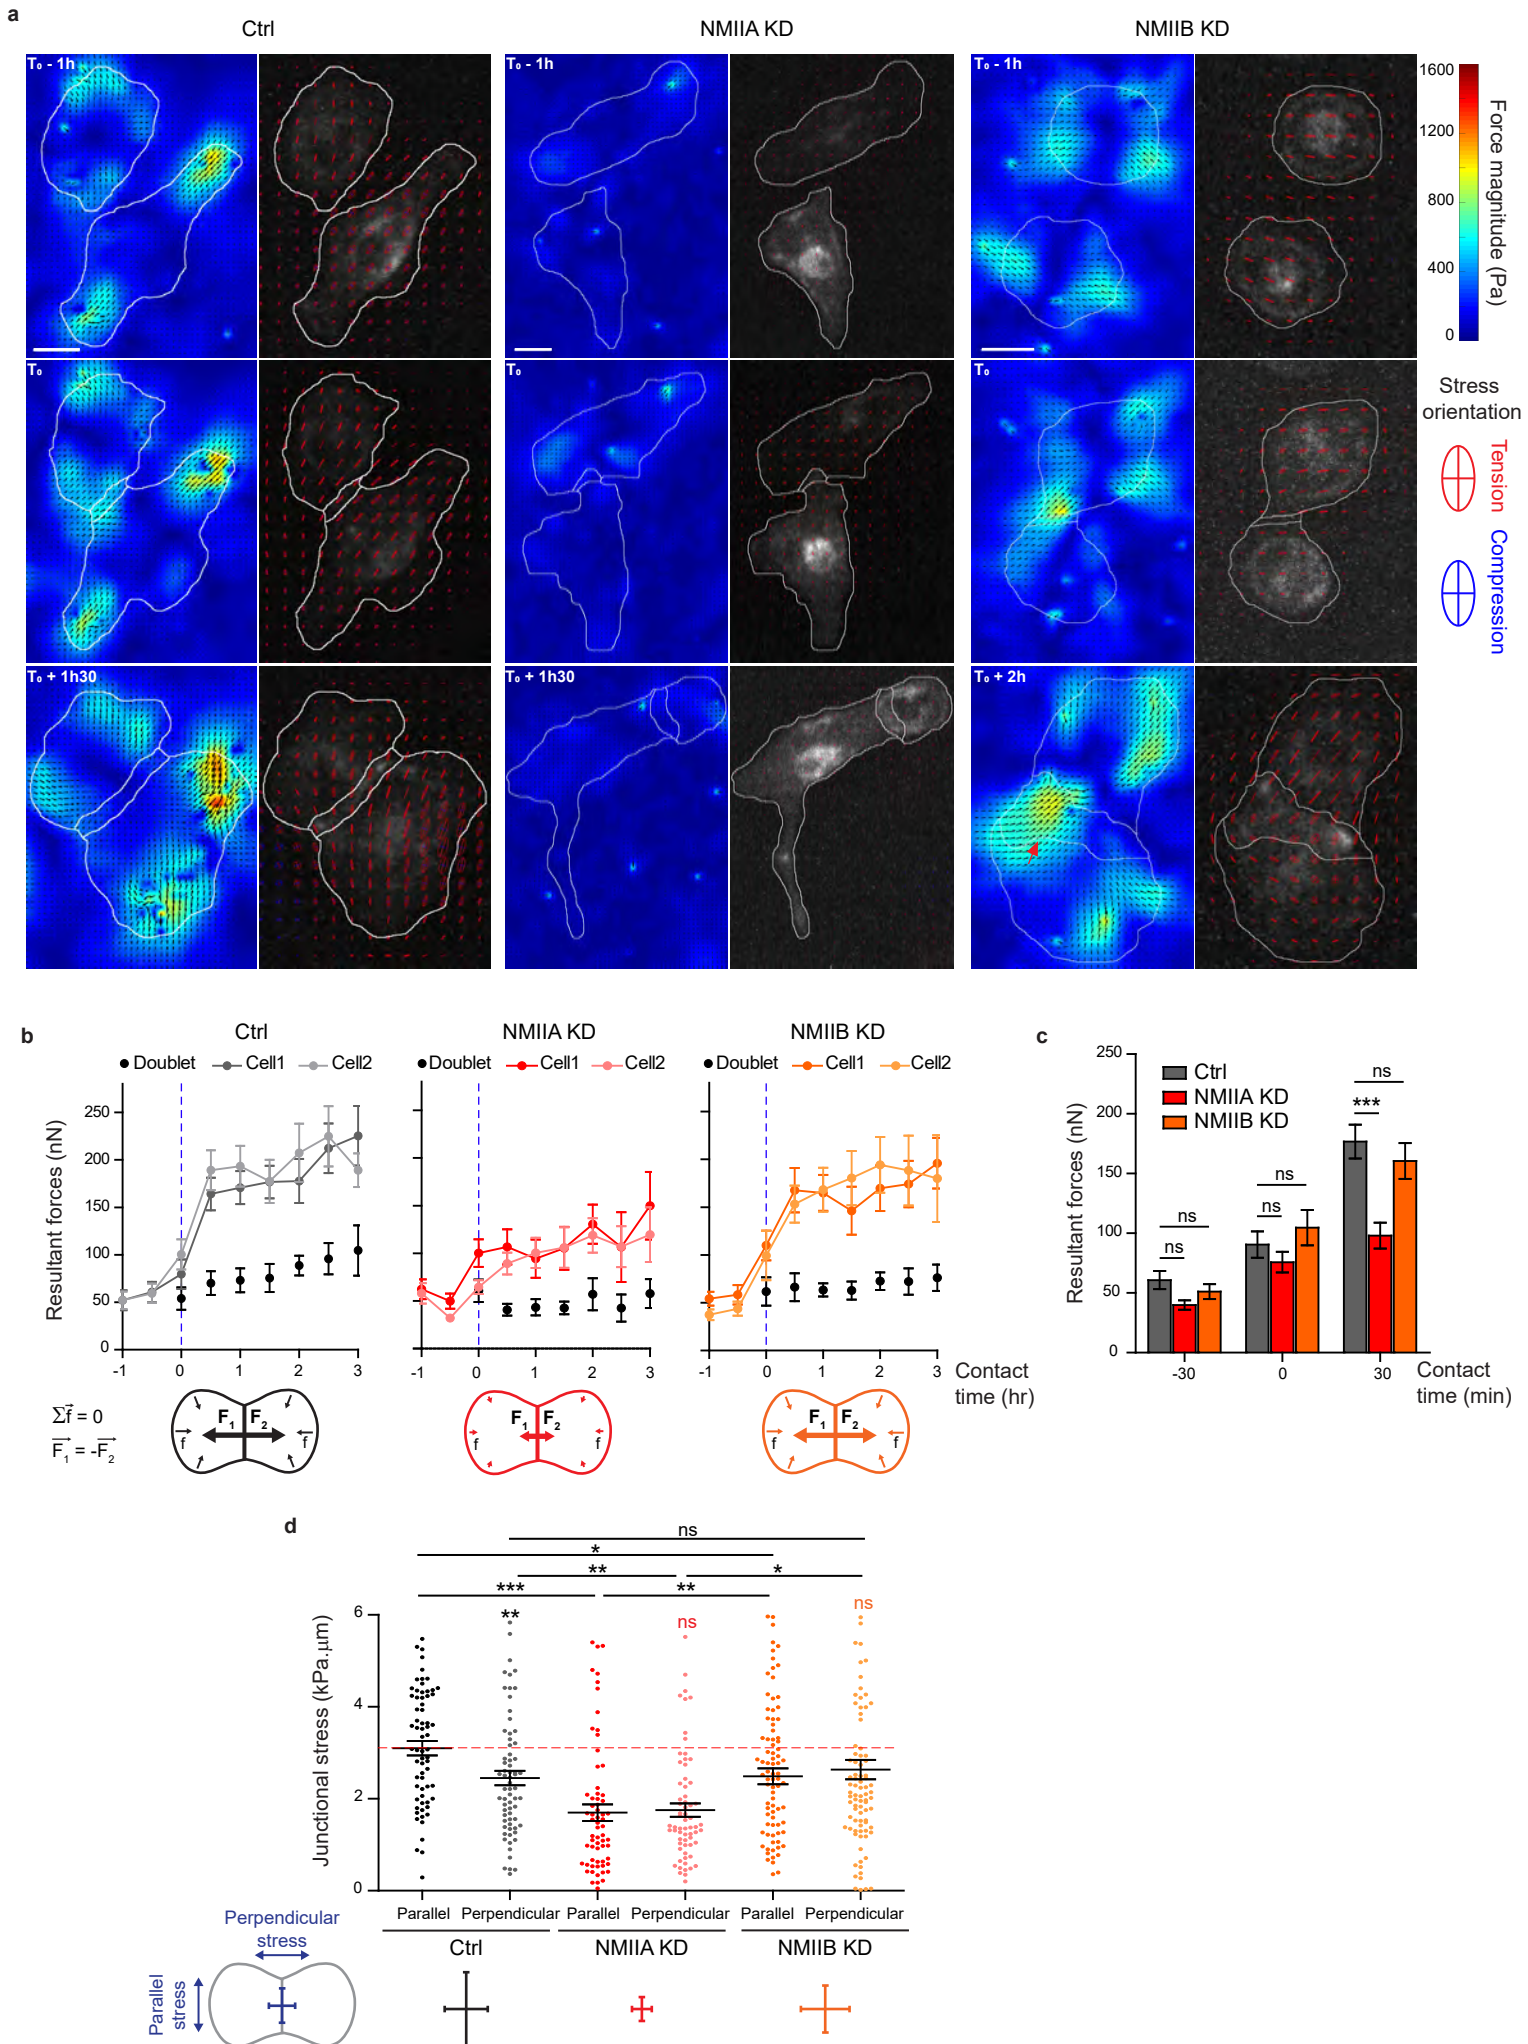



878 **Figure legends**

879

880 **Figure 1: Development of an *in vitro* system for the study of junction biogenesis.**

881 **a.** Spinning disk image sequence showing contact extension between two MDCK cells  
882 expressing GFP-E-cadherin and stained with Hoechst. Scale bar: 10  $\mu\text{m}$ . **b.** Kymograph of the  
883 junction forming in panel b, generated from the yellow line, shown in green and in pseudocolor  
884 to highlight GFP-E-cadherin accumulation at junction tips. The junction axis was realigned  
885 horizontally for some time points in order to generate the kymograph on a long time scale.  
886 Scale bar: 5  $\mu\text{m}$ . **c.** Representative confocal images of  $\beta$ -catenin-stained junctions from MDCK  
887 cell doublets. The arrow points at small holes frequently observed within Y27-treated junctions.  
888 The cells were fixed 20 hours after addition of BCN-RGD alone or BCN-RGD + Y27 (50  $\mu\text{M}$ ).  
889 Scale bar: 10  $\mu\text{m}$ . **d.** Graphs showing the evolution of junction length in function of time after  
890 contact initiation in Ctrl and Y27-treated MDCK cell doublets. Y27 (50  $\mu\text{M}$ ) was added with  
891 BCN-RGD. Data are represented as mean  $\pm$  SEM.  $n = 13$  and 12 cell doublets from two and  
892 three independent experiments, respectively. **e.** Bar graph of the percentage of cell doublets  
893 that stay in contact for more than 3 hours in Ctrl and Y27-treated MDCK cells, respectively.  
894 Data are represented as mean  $\pm$  SEM.  $n = 13$  and 12 cell doublets from two and three  
895 independent experiments, respectively. Bonferroni statistical tests were applied for p value. **f.**  
896 Spinning disk image sequence of GFP-E-cadherin-expressing MDCK cells pre-stained with  
897 Hoechst in the presence of Y27 (50  $\mu\text{M}$ ). The sequence starts 3 hours after addition of BCN-  
898 RGD + Y27. The arrows highlight transient contacts forming under these conditions. Scale bar:  
899 10  $\mu\text{m}$ .

900

901 **Figure 2: NMIIA and NMIIB are both required for proper junction biogenesis.**

902 **a.b.** Left panels: Representative immunoblots showing the isoform specific knockdown of  
903 NMIIA (a) and NMIIB (b) in NMIIA KD and NMIIB KD MDCK cells. GAPDH expression levels  
904 were used as loading controls. Right panels: Bar graphs showing the relative expression level

905 of NMIIA and NMIIB proteins in Ctrl, NMIIA KD and NMIIB KD cells normalized to GAPDH  
906 expression levels. Data are represented as mean  $\pm$  SEM from three independent  
907 experiments. Kruskal-Wallis statistical tests were applied for p value. **c.** Representative  
908 epifluorescent image sequences of GFP-E-cadherin over a time course of 5 hours showing the  
909 dynamics of junction formation at low magnification in Ctrl, NMIIA KD and NMIIB KD MDCK  
910 cells. The arrows indicate the position and the orientation of the junctions. Scale bar: 10  $\mu$ m.  
911 **d.** Bar graph of the percentage of cell doublets that stay in contact for more than 3 hours. Data  
912 are represented as mean  $\pm$  SEM. Tukey's multiple comparison statistical tests were applied  
913 for p value. n = 36, 37 and 31 cell doublets for Ctrl, NMIIA KD and NMIIB KD cells respectively,  
914 from three independent experiments. **e.** Plots showing the evolution of junction length in  
915 function of time for Ctrl, NMIIA KD and NMIIB KD cell doublets. Data are represented as mean  
916  $\pm$  SEM. n = 40, 43 and 35 cell doublets for Ctrl, NMIIA KD and NMIIB KD cells respectively,  
917 from four independent experiments. **f.** Box & whiskers graphs representing the junction length  
918 after 3 hours after contact, for Ctrl, NMIIA KD and NMIIB KD cell doublets. n = 34, 21 and 28  
919 cell doublets for Ctrl, NMIIA KD and NMIIB KD cells respectively, from four independent  
920 experiments. **g.** Box & whiskers graphs showing the junction straightness (calculated as the  
921 euclidean/accumulated length ratio) in Ctrl, NMIIA KD and NMIIB KD cell doublets 2 hours  
922 after contact. n = 12, 15 and 17 cell doublets for Ctrl, NMIIA KD and NMIIB KD cells  
923 respectively, from three independent experiments. **h.** Box & whiskers graph showing the  
924 angular deviation of junctions during the 3 first hours of contact in Ctrl, NMIIA KD and NMIIB  
925 KD cell doublets. n = 35, 30 and 32 cell doublets for Ctrl, NMIIA KD and NMIIB KD cells  
926 respectively, from four independent experiments. **f-h:** Mann-Whitney statistical tests were  
927 applied for p value. **i.** Representative spinning disk GFP-E-cadherin image sequences over a  
928 time course of 4 hours showing the dynamics of junction formation at high magnification in Ctrl,  
929 NMIIA KD and NMIIB KD MDCK cells. The red arrows point at junctional extensions typically  
930 observed in NMIIB KD doublets. Scale bar: 10  $\mu$ m.

931

932

933 **Figure 3: NMIIB, but not NMIIA, localizes to early AJs**

934 **a.c.** Representative confocal images and zoom boxes of GFP-E-cadherin-expressing MDCK  
935 cell doublets fixed 20 h after BCN-RGD addition and immuno-stained for NMIIA (a) or NMIIB  
936 (c). Scale bar: 10  $\mu\text{m}$ . **b.d.** Relative intensity profiles (raw and smoothed data) of GFP-E-  
937 cadherin and NMIIA (b) or NMIIB (d) signals along the lines represented in (a) and (c)  
938 respectively. **e.** Representative confocal images and zoom boxes of WT (upper panel) or  $\alpha$ -  
939 catenin KD (lower panel) MDCK cells fixed 20 h after BCN-RGD addition and immuno-stained  
940 for NMIIA and NMIIB. White arrow heads indicate the cell-cell contact which is depicted as a  
941 dotted line in  $\alpha$ -catenin KD MDCK cells. Scale bar: 10  $\mu\text{m}$ . **f.** Representative confocal images  
942 of WT MDCK cells plated on fibronectin-coated glass for 1 or 3 days and stained for F-actin,  
943 NMIIA and NMIIB. Scale bar: 10  $\mu\text{m}$ .

944

945 **Figure 4: NMIIB localizes to a junctional actin network distinct from NMIIA-associated**  
946 **actin**

947 **a-d.** SIM (Structured Illumination Microscopy) images of WT MDCK cells fixed 20h after  
948 addition of BCN-RGD and stained as indicated. Scale bar: 3  $\mu\text{m}$ .

949

950 **Figure 5: NMIIB supports junctional branched actin organization and regulates  $\alpha$ -**  
951 **catenin unfolding**

952 **a.** SIM (Structured Illumination Microscopy) images of junctional areas from Ctrl, NMIIA KD  
953 and NMIIB KD cells fixed 20 h after addition of BCN-RGD and stained for F-actin and  $\beta$ -catenin.  
954 Scale bar: 5  $\mu\text{m}$ . **b.c.** Representative epifluorescent (b) or confocal (c) images with zoom boxes  
955 of MDCK cells and stained as indicated. Scale bar: 10  $\mu\text{m}$ . **d.** Representative confocal images  
956 of junctional area from Ctrl, NMIIA KD and NMIIB KD cells stained for  $\alpha$ -catenin and  $\alpha$ -cat18.  
957 Scale bar: 10  $\mu\text{m}$ . **e.f.** Scatter plots with mean  $\pm$  SEM showing the ratio of junctional  $\alpha$ -  
958 cat18/ $\alpha$ -catenin signals (e) and the mean intensity levels of  $\alpha$ -catenin signal at the junction (f).

959 n = 27, 20, 25 cell doublets for ctrl, NMIIAKD and NMIIBKD, respectively from two independent  
960 experiments. Kruskal-Wallis statistical tests were applied for p value.

961

962 **Figure 6: NMIIA, but not NMIIB, regulates cell-matrix adhesions and traction forces**

963 **a.** Representative confocal images of paxillin and F-actin staining of Ctrl, NMIIA KD and NMIIB  
964 KD single cells plated on fibronectin-coated glass coverslip for 16 hours. Scale bar: 10  $\mu\text{m}$ .

965 **b.c.** Scatter plots with mean  $\pm$  SEM showing the spreading area (b) and number of focal  
966 adhesions (c) of Ctrl, NMIIA KD and NMIIB KD single cells plated on fibronectin for 16 hours.

967 n = 23, 21 and 30 cells for (b) and 26, 39 and 34 cells for (c) respectively, from two independent  
968 experiments. Kruskal-Wallis statistical tests were applied for p value. **d.** Heat map (upper

969 panel) and vectorial field (lower panel) representing respectively the magnitude and the  
970 orientation of traction forces exerted by the single Ctrl, NMIIA KD and NMIIB KD cells, on

971 fibronectin-coated PDMS deformable substrate (30 KPa). Cell masks used for quantification  
972 are drawn in white. Scale bar: 10  $\mu\text{m}$ . **e.** Scatter plots with mean  $\pm$  SEM showing the mean

973 traction forces exerted by single Ctrl, NMIIA KD and NMIIB KD cells. n = 32, 53 and 54 cells,  
974 respectively. Kruskal-Wallis statistical tests were applied for p value.

975

976 **Figure 7: NMIIB favours E-cadherin clustering on E-cadherin-coated substrate**

977 **a.** Confocal images with zoom boxes of Ctrl, NMIIA KD and NMIIB KD cells plated on E-  
978 cadherin-coated glass for 6 hours and immuno-stained for  $\beta$ -catenin and F-actin. Scale bar:

979 10  $\mu\text{m}$ . **b.** Scheme depicting the experimental set-up. **c.** Scatter plots with mean  $\pm$  SEM  
980 showing the cell spreading area of Ctrl, NMIIA KD and NMIIB KD cells plated on E-cadherin

981 coated glass after 6 hours. n = 87, 58 and 58 cells respectively from two independent  
982 experiments. Kruskal-Wallis statistical tests were applied for p value. **d.** Bar graph showing the

983 number of  $\beta$ -catenin clusters per cell in Ctrl, NMIIA KD and NMIIB KD cells plated on E-  
984 cadherin coated glass. The clusters were classified in two categories: large clusters with area

985 larger than 1  $\mu\text{m}^2$ , and small clusters with area ranging from 0.2  $\mu\text{m}^2$  to 1  $\mu\text{m}^2$ . Data are  
986 represented as mean  $\pm$  SEM, n = 26, 27 and 26 cells respectively from two independent

987 experiments. Kruskal-Wallis statistical test were applied for p value **e**. Heat map (top panel)  
988 and vectorial field (bottom panel) representing respectively the magnitude and the orientation  
989 of traction forces exerted by the single Ctrl, NMIIA KD and NMIIB KD cells on E-cadherin  
990 coated PDMS deformable gels (15 KPa). Cell masks used for quantification are drawn in white.  
991 Scale bar: 20  $\mu\text{m}$ . **f**. Scatter plots with mean  $\pm$  SEM showing the mean traction forces exerted  
992 by Ctrl, NMIIA KD and NMIIB KD cells on E-cadherin coated PDMS deformable gels (15 KPa).  
993  $n = 46, 34$  and  $34$  cells respectively from two independent experiments. Kruskal-Wallis  
994 statistical tests were applied for p value.

995

996 **Figure 8: NMIIA and NMIIB are both required for establishment of proper inter-cellular**  
997 **stress**

998 **a**. Heatmap with vectorial field of traction forces (left panels) and ellipse representation of intra-  
999 cellular stress (right panel, the two axes represent the direction and magnitude of the principal  
1000 components of the stress tensor, positive values in red, negative values in blue) of inter-cellular  
1001 stress (right panels) in Ctrl, NMIIA KD and NMIIB KD cell pairs before, during and after contact  
1002 on fibronectin-coated PDMS deformable substrate (30 KPa). Cell contours are drawn in white.  
1003 The red arrows indicate a hotspot of traction forces observed frequently in NMIIB KD cell  
1004 doublets. Scale bar: 10  $\mu\text{m}$ . **b**. Linear graphs representing the resultant forces of cell doublets  
1005 and individual cells before, during and after contact in Ctrl, NMIIA KD and NMIIB KD. Data are  
1006 represented as mean  $\pm$  SEM. **c**. The same data as in b were represented as bar graph with  
1007 mean  $\pm$  SEM for statistical comparisons between Ctrl, NMIIA KD and NMIIB KD cells 30  
1008 minutes before, during and 30 minutes after contact. Bonferroni statistical tests were applied  
1009 for p value. **d**. Scatter plots with mean  $\pm$  SEM representing inter-cellular stress in the  
1010 junctional area in Ctrl, NMIIA KD and NMIIB KD cells within the first 3 hours of contact. The  
1011 stress orientation was divided in the parallel and perpendicular components relative to the main  
1012 axis of the junction. Mann-Whitney (for intra-group comparisons) and Kruskal-wallis statistical  
1013 tests were applied for p value. **b-d**:  $n = 15, 20$  and  $18$  cell doublets for Ctrl, NMIIA KD and  
1014 NMIIB KD, respectively.

## Supplementary Figure 1

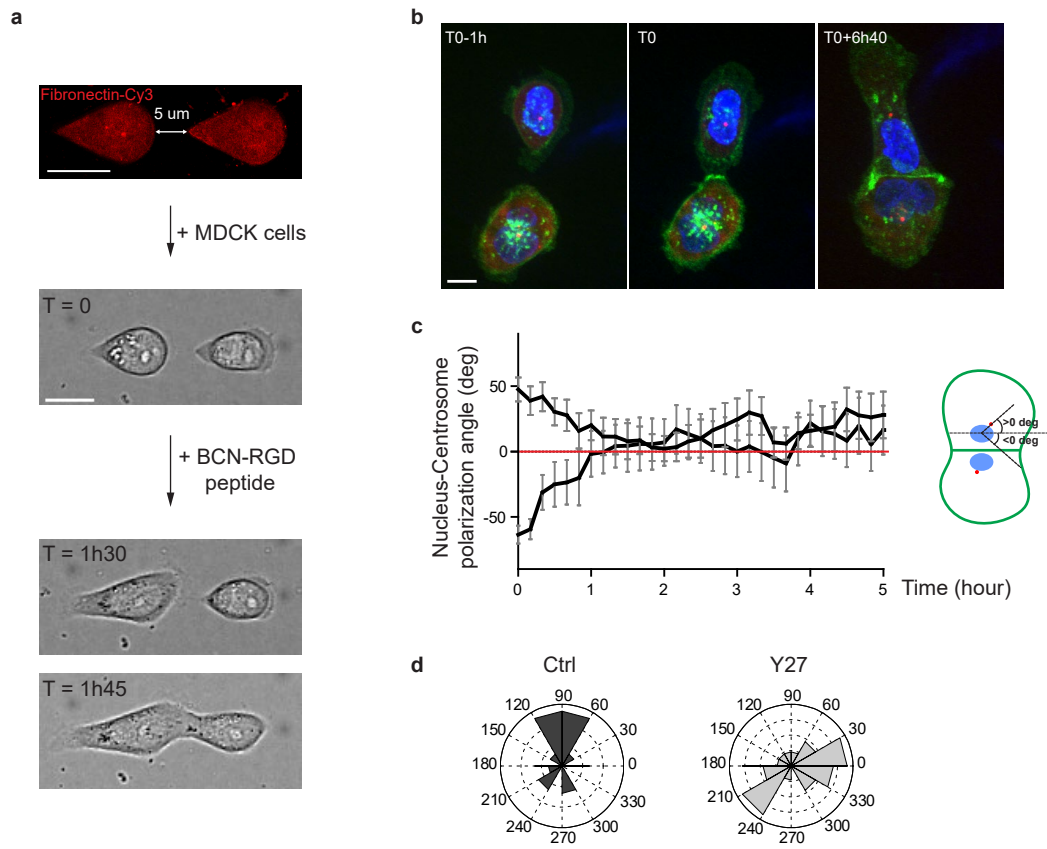

## **Supplementary figure 1: Reversal of nucleus-centrosome polarity axis after cell-cell contact**

**a.** Sequential steps for controlled initiation and visualization of junction biogenesis. The two cells are initially confined on a pair of fibronectin-coated 5  $\mu\text{m}$ -away patterns (T=0). When desired, the cell confinement is released by addition of BCN-RGD peptide, inducing cell spreading and kissing within a few hours. Scale Bar: 10  $\mu\text{m}$ . **b.** Spinning disk image sequence of GFP-E-cadherin and RFP-Pericentrin of doubled transfected MDCK cells pre-stained with Hoechst. Scale bar: 10  $\mu\text{m}$ . **c.** Plots of nucleus-centrosome axis polarization angle relative to junction axis after cell-cell contact. Data are represented as mean  $\pm$  SEM.  $n = 19$  doublets from three independent experiments. **d.** Distribution of nucleus-centrosome axis polarization angles relative to junction axis after cell-cell contact in Ctrl or Y27-treated MDCK cells at the time when junctions reach their maximal length.  $n = 15$  and 21 cells from three and two independent experiments respectively.

## Supplementary Figure 2

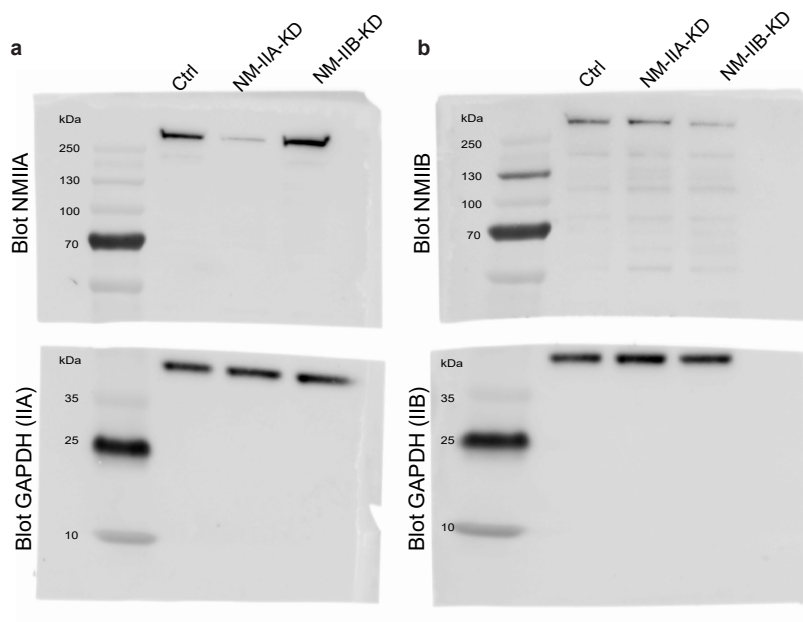



## **Supplementary figure 2: Isoform-specific NMII Knock-down in MDCK cells**

**a.b.** Original uncropped Immunoblots presented in Figure 2a (a) and 2b (b).

### Supplementary Figure 3

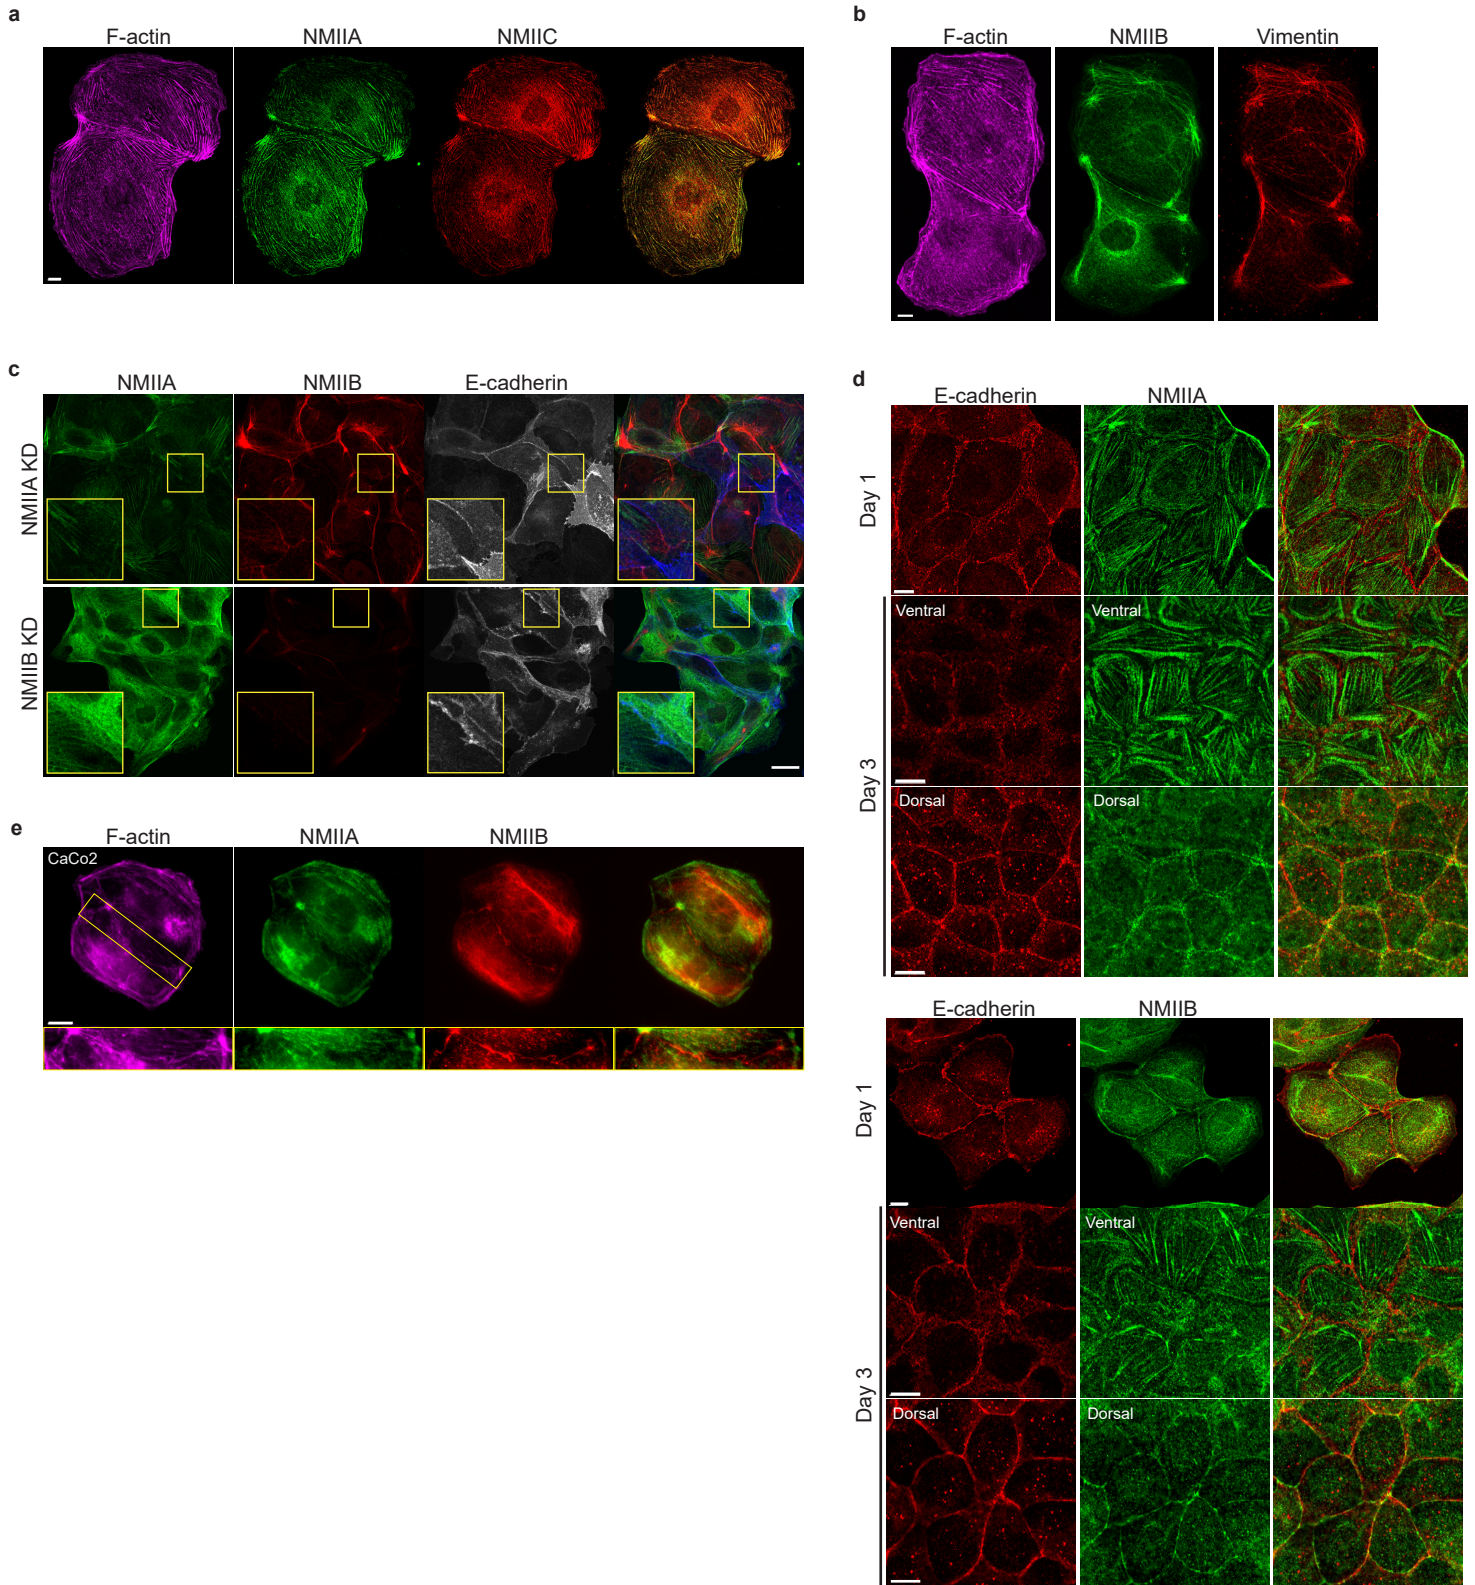

### **Supplementary figure 3: NMIIB, but not NMIIA, localizes to early epithelial AJs**

**a.b.** Representative confocal images of MDCK cell doublets fixed 20h after BCN-RGD addition and stained for F-actin, NMIIA and NMIIC (a) or F-actin, NMIIB and Vimentin (b) as indicated. Scale bar: 10 $\mu$ m. **c.** Representative confocal images of NMIIA KD and NMIIB KD MDCK cells plated at low density on fibronectin, fixed after 12 hours and immuno-stained for NMIIA, NMIIB and E-cadherin. Scale bar: 20 $\mu$ m. **d.** Representative confocal images of WT MDCK cells plated on fibronectin-coated glass for 1 or 3 days and immuno-stained for E-cadherin and NMIIA (left panel) or NMIIB (right panel). Scale bar: 10 $\mu$ m. **e.** Representative epifluorescent images of Caco-2 cells plated at low density on fibronectin, fixed after 12 hours and stained for indicated proteins. Scale bar: 10 $\mu$ m.

### Supplementary Figure 4

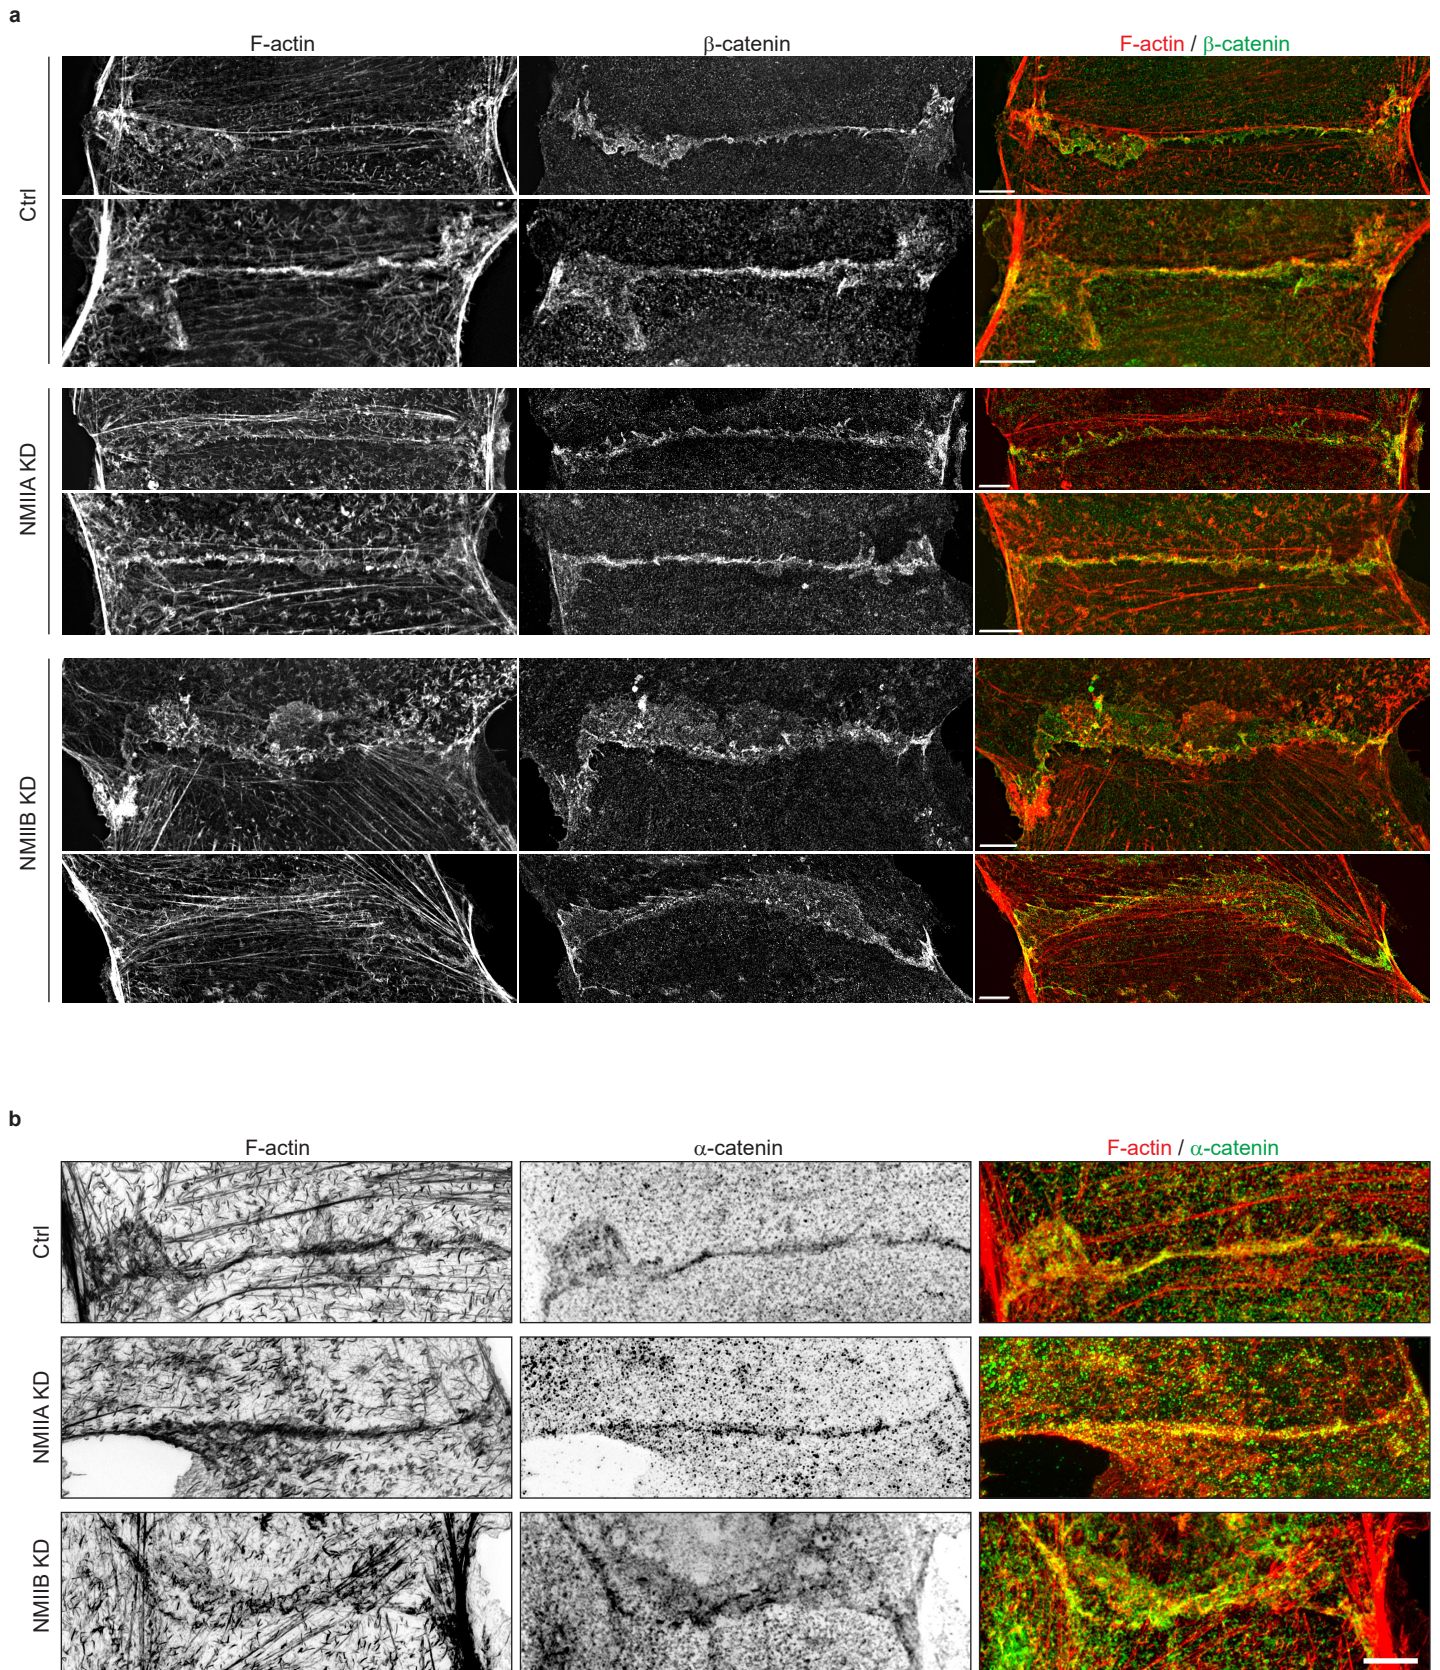

#### **Supplementary figure 4: NMIIB supports junctional actin organization**

Related to Figure 5a: other examples of junctional actin organization in Ctrl, NMIIA KD and NMIIB KD cells. **a.b.** SIM (Structured Illumination Microscopy) images of junctional area from Ctrl, NMIIA KD and NMIIB KD cells fixed 20h after addition of BCN-RGD and stained for F-actin and  $\beta$ -catenin (a) or  $\alpha$ -catenin (b). Scale bar: 5  $\mu$ m.

## Supplementary Figure 5

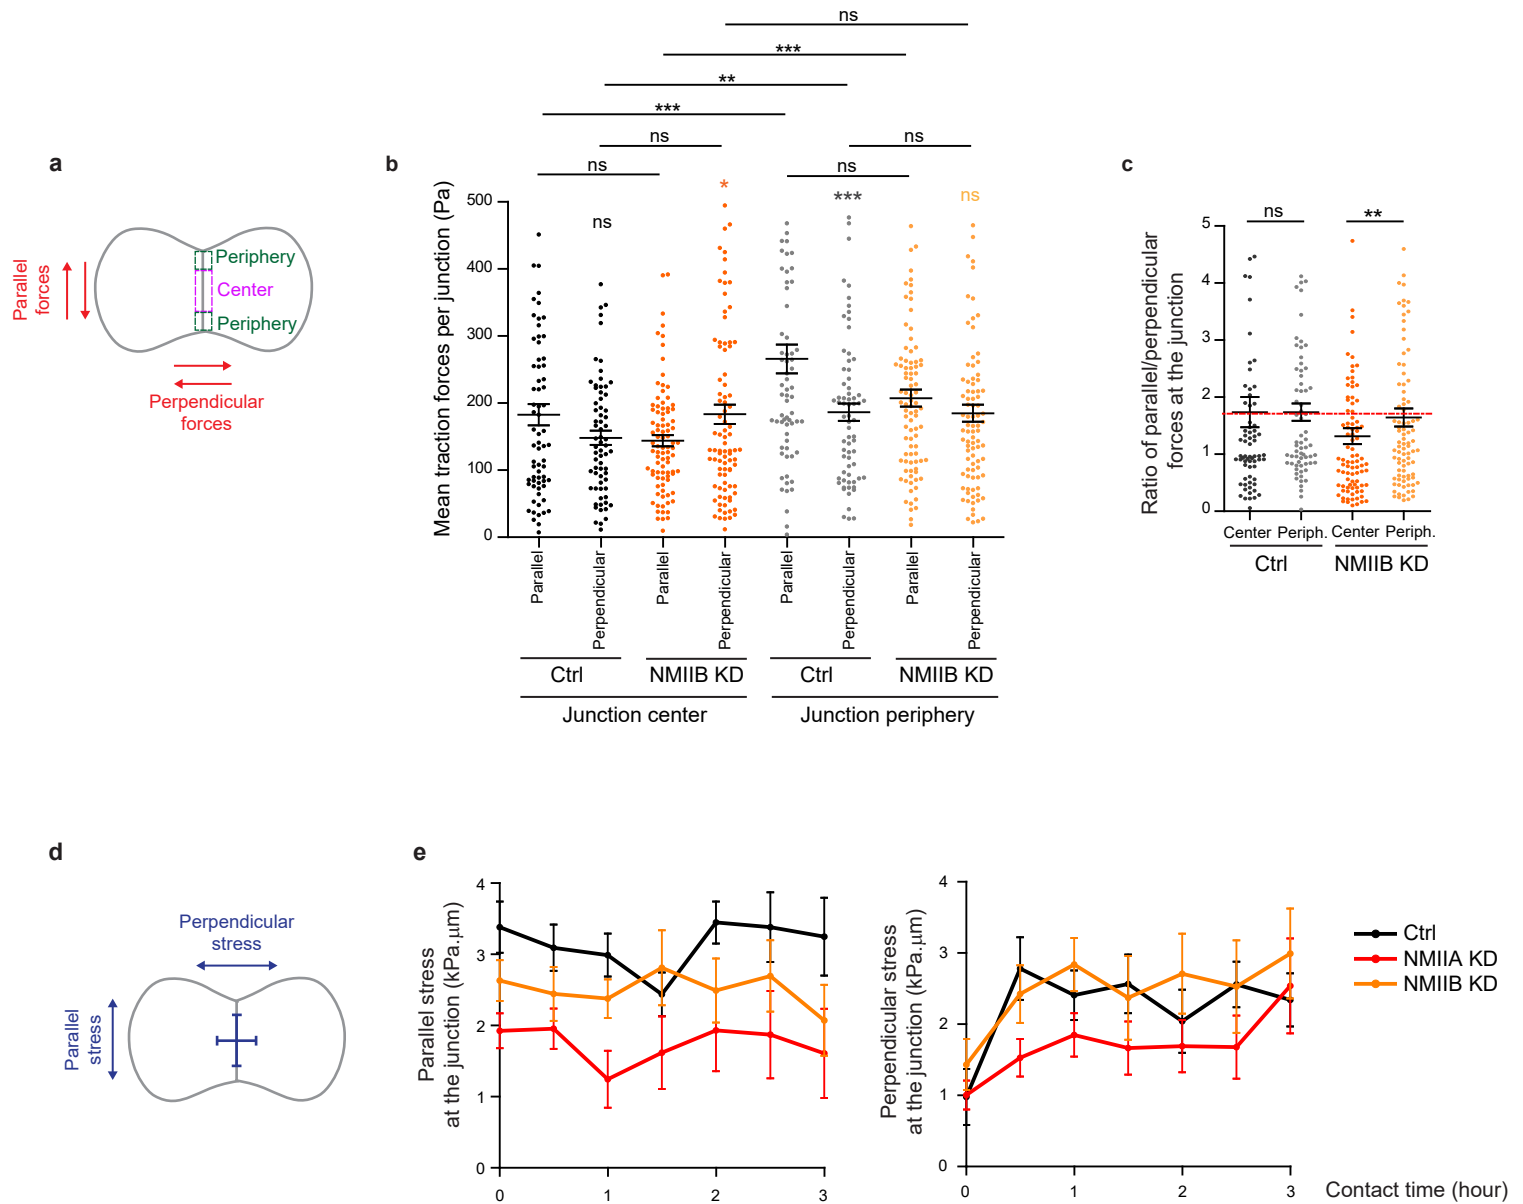

## **Supplementary figure 5: NMIIA and NMIIB are both required for establishment of proper inter-cellular stress**

**a.** Scheme depicting the junction subdomains and the orientation of traction forces relative to the junction axis quantified in (b) and (c). **b.c.** Scatter plots with mean  $\pm$  SEM representing the orientation of mean traction forces (b) and the ratio of parallel/perpendicular traction forces (c) in subdomains of the junction in Ctrl and NMIIB KD cells within the first 3 hours of contact. Mann-Whitney (for intra-group comparisons) and Kruskal-wallis statistical tests were applied for p value. n = 15 and 18 cell doublets respectively. **d.** Scheme depicting the orientation of inter-cellular stress relative to the junction axis quantified in (e). **e.** Linear graph of parallel (left panel) and perpendicular (right panel) inter-cellular stress at the junction within the first 3 hours after contact in Ctrl, NMIIA KD and NMIIB KD cells. Data are represented as mean  $\pm$  SEM. n= 15, 20 and 18 cell doublets for Ctrl, NMIIA KD and NMIIB KD respectively.

## Supplementary Figure 6

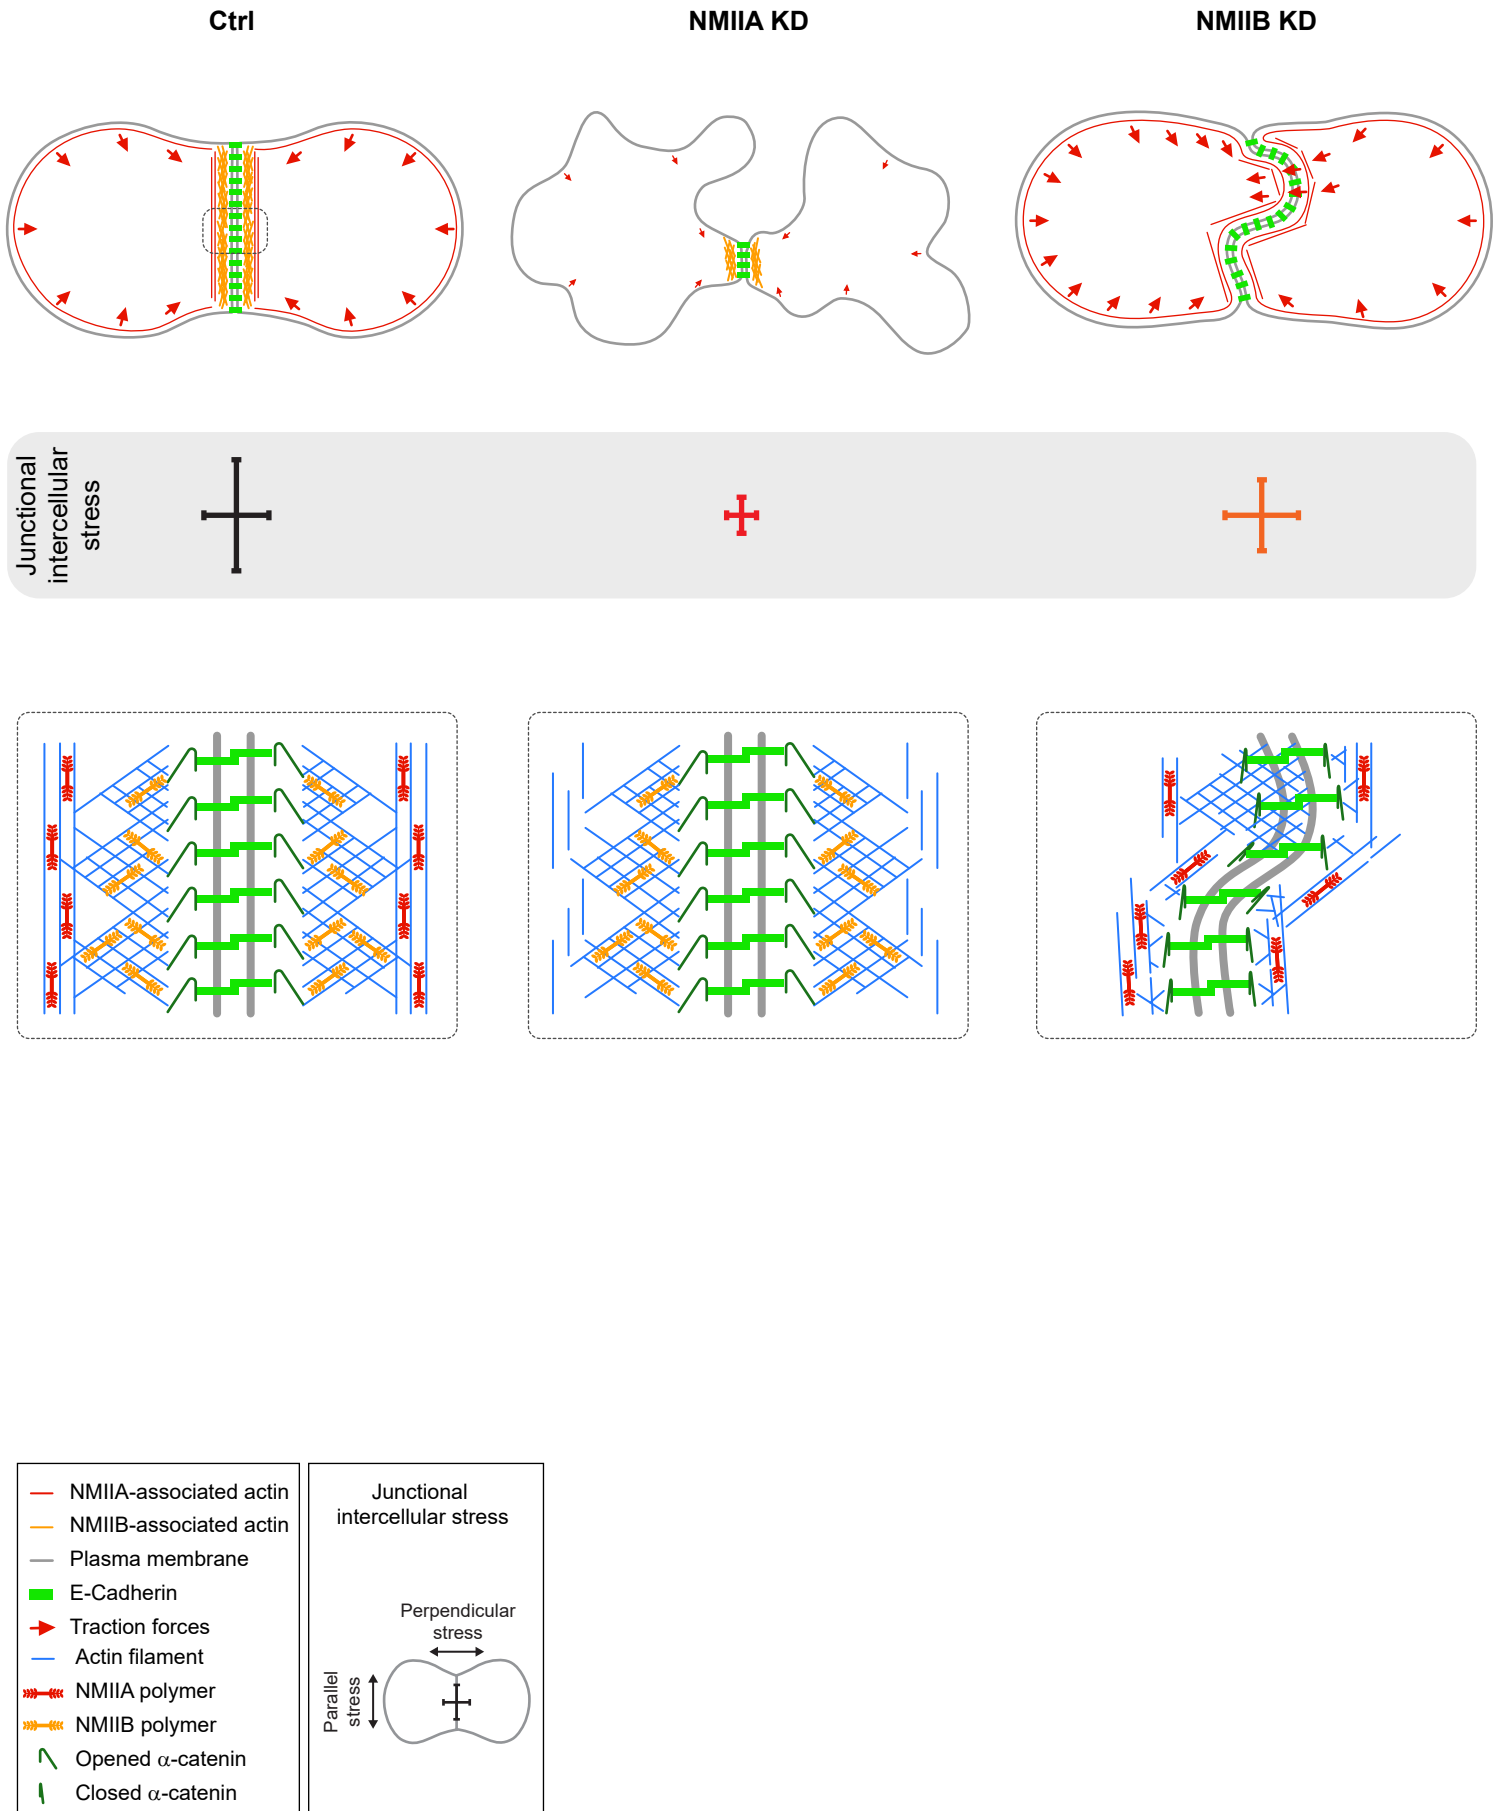



## **Supplementary figure 6: Proposed model for the role of NMIIA and NMIIB during junction biogenesis**

Upper panels: summary of the phenotypes observed in Ctrl, NMIIA KD and NMIIB KD cells during junction biogenesis. Lower panels: proposed molecular organization of early junctions in all three cell lines, based on the results obtained in this study and previous ones (see Discussion part).

Ctrl cells establish stable and straight junctions with traction forces mainly peripheral, generating an anisotropic intercellular stress preferentially parallel to the junction. NMIIB associates to- and organizes the junctional branched actin meshwork, and favours the opening of  $\alpha$ -catenin molecules. NMIIA, which provides mechanical tugging force, sits on distant perijunctional actin bundles parallel to the junction. Actin cables parallel to the cortex and ventral stress fibers (not represented here for clarity of the figure).

NMIIA KD cells fail to keep contact for long times, exhibit shorter junctions, weak traction forces and weak intercellular stress. Perijunctional actin bundles are smaller and disorganized. The junctional NMIIB-actin meshwork still supports  $\alpha$ -catenin opened conformation but it does not prevent the junction from disassembly.

NMIIB KD cells establish persistent but wavy junctions from which lamellipodial extensions and traction force hotspots arise. There is no preferential orientation of intercellular stress. The junctional branched actin meshwork is disorganized, which probably prevents  $\alpha$ -catenin opening and induces the formation of lamellipodial extensions. The anchoring of perijunctional actin bundles to the junction is perturbed, despite the presence of NMIIA.

## **Supplementary Video legends**

### **Supplementary Video 1: Dynamic of junction formation on reversible micropatterns**

Spinning disk movie showing contact formation between two MDCK cells expressing GFP-E-cadherin and stained with Hoechst. Scale bar: 10  $\mu\text{m}$ .

### **Supplementary Video 2: Dynamic of junction formation in Y27-treated cells**

Spinning disk movie of MDCK cells expressing GFP-E-cadherin, stained with Hoechst and treated with 50  $\mu\text{M}$  Y27. Scale bar: 10  $\mu\text{m}$ .

### **Supplementary Video 3: Dynamic of junction formation in Ctrl, NMIIA KD and NMIIB KD cells**

Epi-fluorescent movies of Ctrl, NMIIA KD and NMIIB KD MDCK cells expressing GFP-E-cadherin. Scale bar: 10  $\mu\text{m}$ .
